# Supplementary material
Source: PubMed Central journal article supplement (PMC7266679)
Supplement: NIHMS1584831-supplement-S1_b_.pdf [file NIHMS1584831-supplement-S1_b_.pdf]

**Peripheral blood leukemic burden does not correlate with cytopenias or BM leukemic**

**burden.** (A) hemoglobin ( $R^2=0.0046$ ,  $p=0.016$ ), (B) platelet count ( $R^2=0.015$ ,  $p=9.4e-06$ ), and

(C) PB blast percentage ( $R^2=0.22$ ,  $p=1.5e-65$ ) with BM blast percentage at time of diagnosis.

$R^2$ =Pearson correlation of determination.
