# Supplementary material
Source: PubMed Central journal article supplement (PMC7266679)
Supplement: NIHMS1584831-supplement-S2_b_.pdf [file NIHMS1584831-supplement-S2_b_.pdf]

# Supplementary Materials for

## **IL-6 Blockade Reverses Bone Marrow Failure Induced by Human Acute Myeloid Leukemia**

**Authors:** Tian Yi Zhang<sup>1-3\*</sup>, Ritika Dutta<sup>1-3</sup>, Brooks Benard<sup>4</sup>, Feifei Zhao<sup>1-3</sup>, Ravindra Majeti<sup>1-3</sup>

**Affiliations:**

<sup>1</sup>Department of Medicine, Division of Hematology, Stanford University, Stanford, California, USA.

<sup>2</sup>Stanford School of Medicine, Stanford, California, USA.

<sup>3</sup>Department of Medicine, Division of Hematology, Cancer Institute, and Institute for Stem Cell Biology and Regenerative Medicine, Stanford University, Stanford, California, USA.

<sup>4</sup>Cancer Biology Program, Stanford University School of Medicine, Stanford, California, USA.

\*To whom correspondence should be addressed: [tzhang8@stanford.edu](mailto:tzhang8@stanford.edu), [rmajeti@stanford.edu](mailto:rmajeti@stanford.edu)

Fig. S1

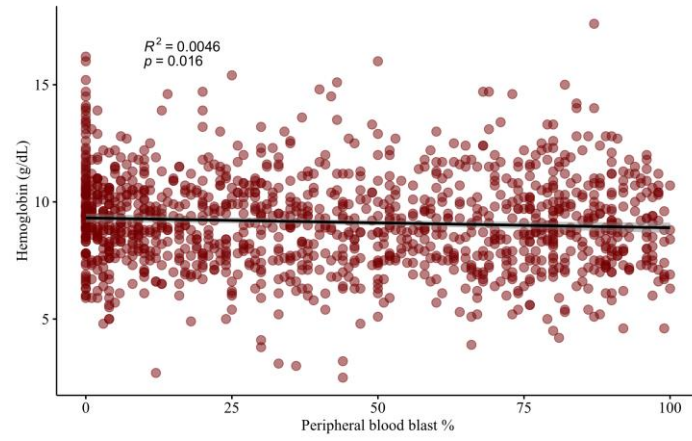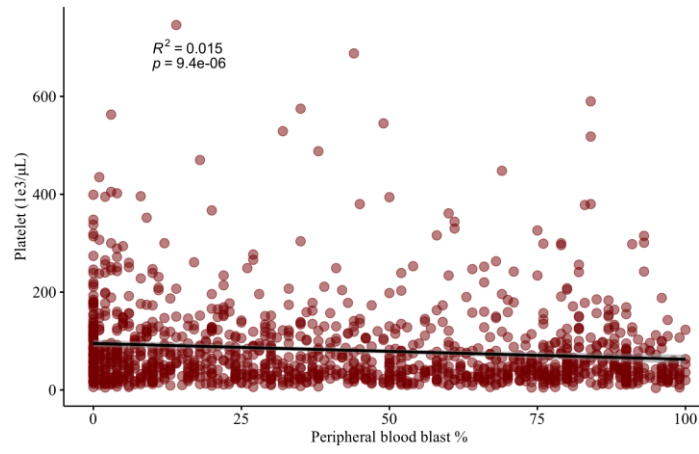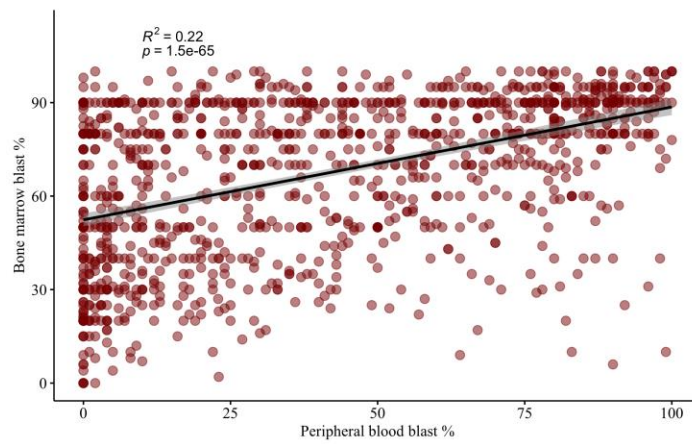

**Peripheral blood leukemic burden does not correlate with cytopenias or BM leukemic**

**burden.** (A) hemoglobin ( $R^2=0.0046$ ,  $p=0.016$ ), (B) platelet count ( $R^2=0.015$ ,  $p=9.4e-06$ ), and

(C) PB blast percentage ( $R^2=0.22$ ,  $p=1.5e-65$ ) with BM blast percentage at time of diagnosis.

$R^2$ =Pearson correlation of determination.

Fig. S2

A.

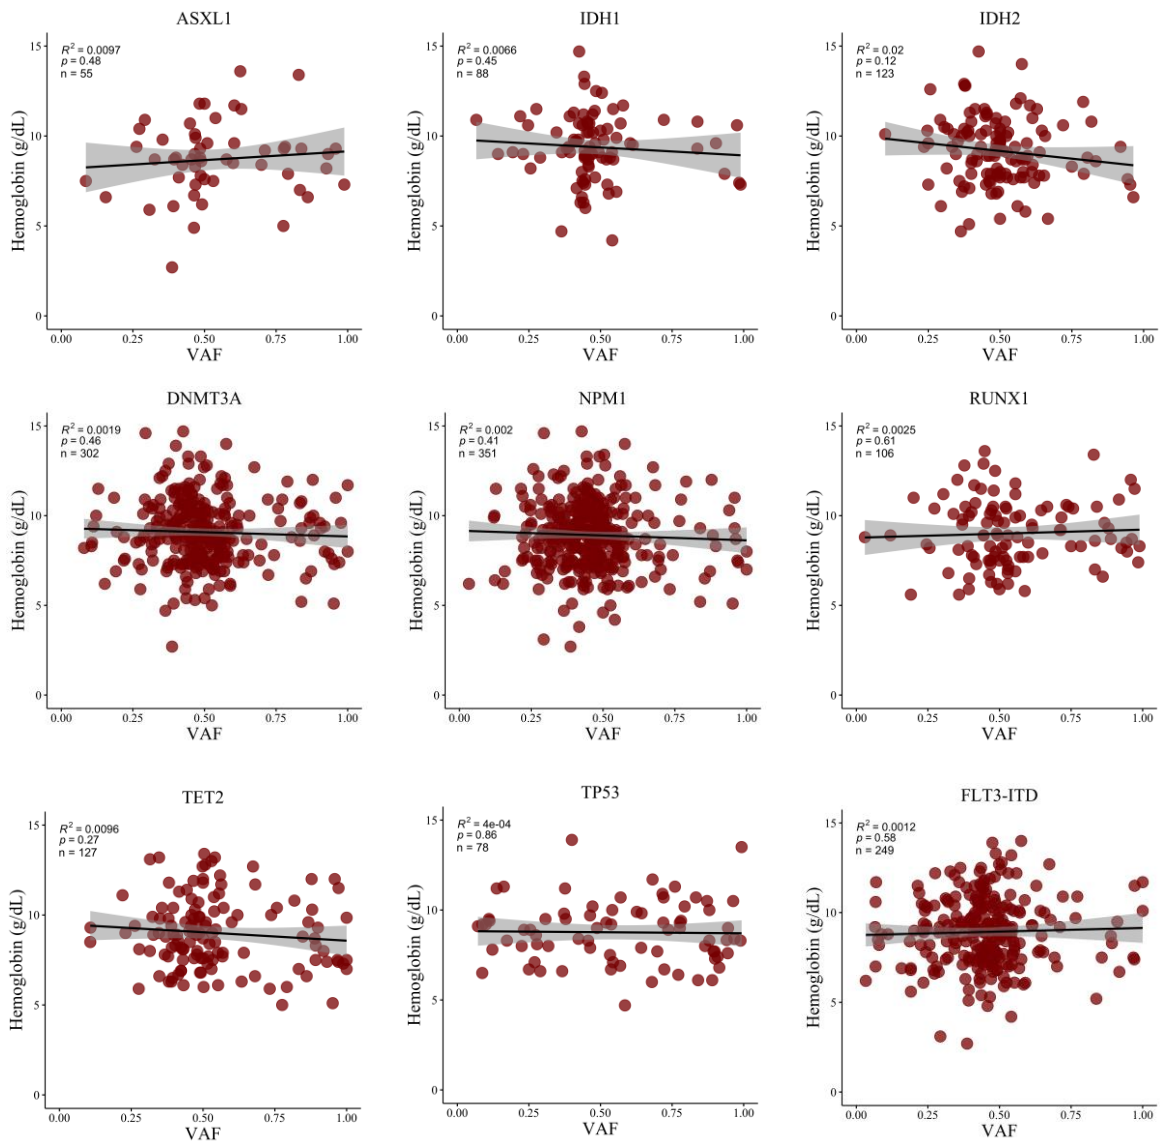

B.

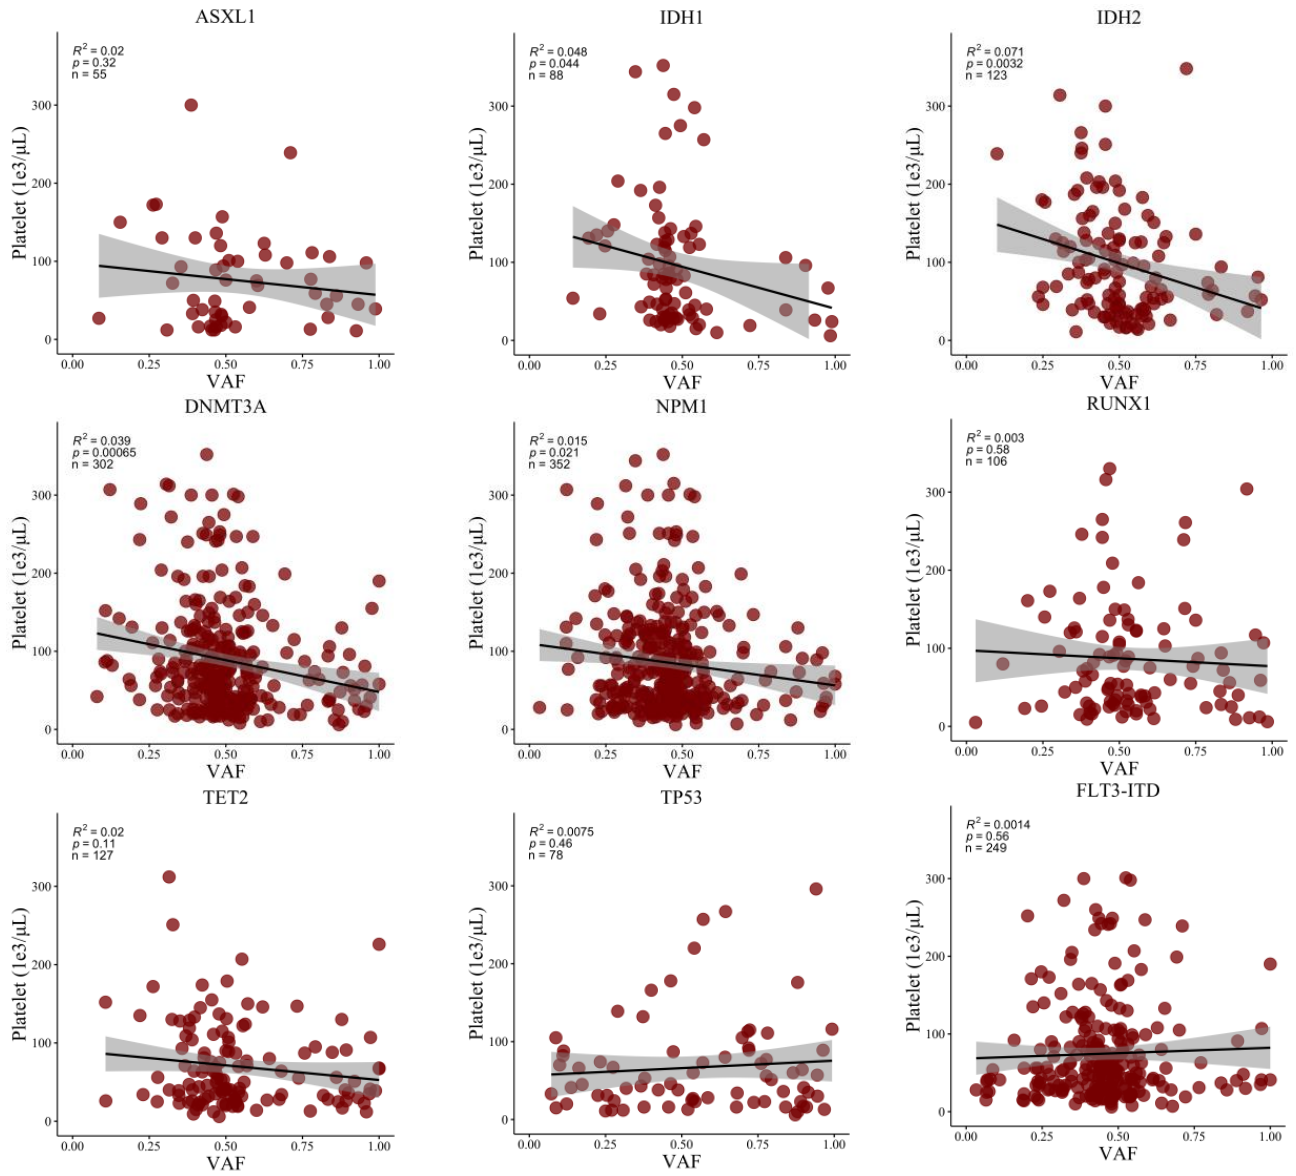

**Leukemic burden estimated by variant allelic frequency does not correlate with severity of cytopenias.** Correlation of (A) hemoglobin and (B) platelet count with VAF of recurrently mutated genes in AML.  $R^2$ =Pearson correlation of determination.

Fig. S3.

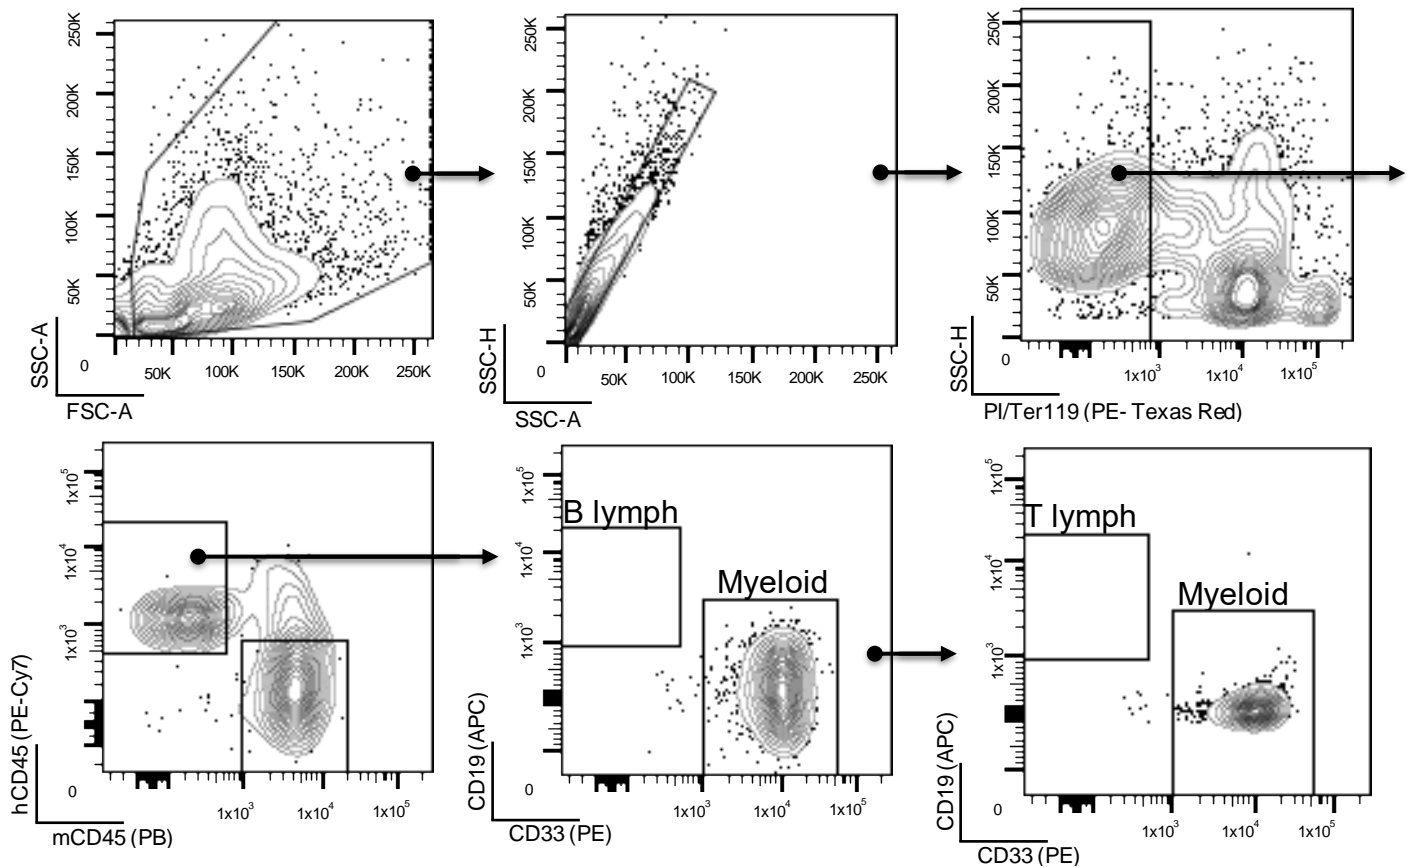

**Representative markers and gating strategy to determine human AML engraftment in NSG mice.** Femoral aspirates were obtained at 12 weeks after transplantation and stained with a panel of human myeloid- and lymphocyte-specific antibodies followed by flow cytometry analysis. The presence of mCD45<sup>-</sup>hCD45<sup>+</sup>CD33<sup>+</sup>CD3<sup>-</sup>CD19<sup>-</sup> cells is indicative of successful engraftment by human AML. Mice with bi-lineage engraftment (with additional presence of mCD45<sup>-</sup>hCD45<sup>+</sup>CD33<sup>-</sup>CD3<sup>-</sup>CD19<sup>+</sup> cells) after transplantation would be indicative of engraftment with normal human multipotent progenitors rather than leukemic cells and were therefore excluded from analysis.

Figure. S4.

A.

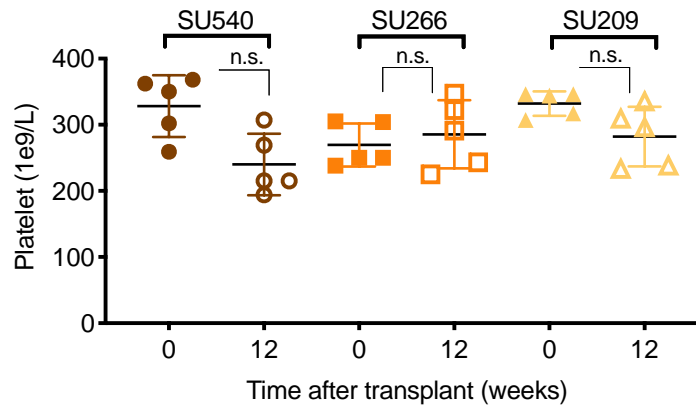

B.

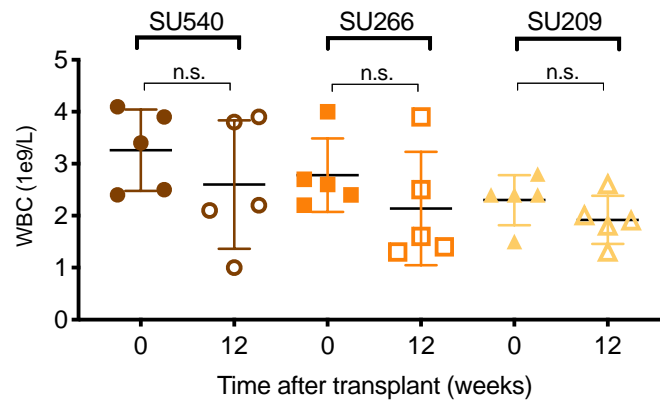

**Conventional NSG AML xenografts do not develop BM failure evidenced by lack of cytopenias.** (A) Platelet and (B) WBC count was measured via tail vein every two weeks, and results at 12 weeks are shown (n.s. = not significant).

Fig. S5

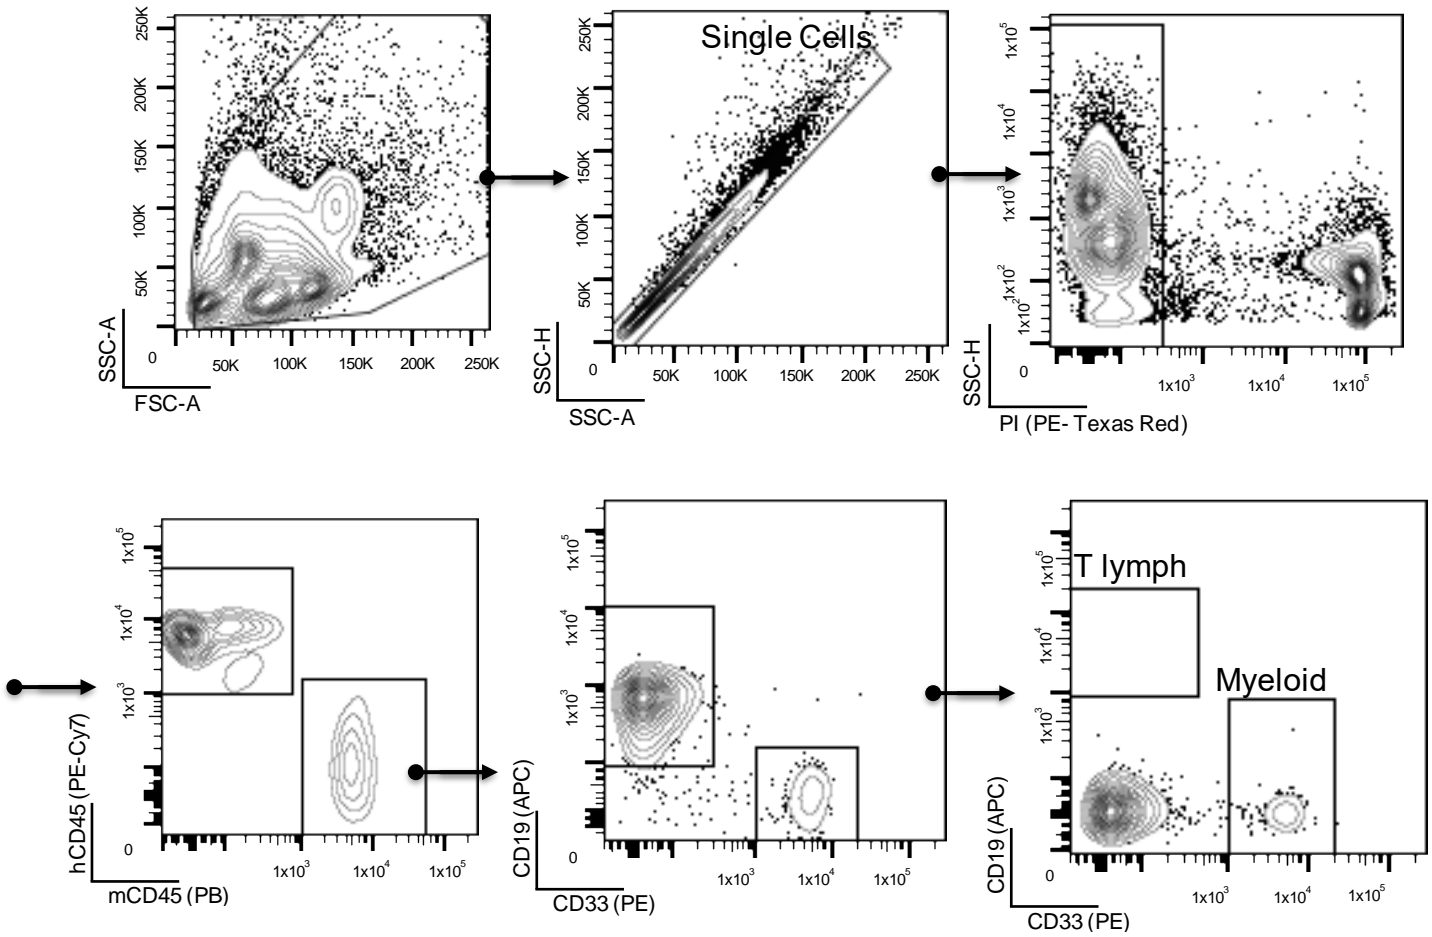

**Representative markers and gating strategy to determine human normal CB-CD34<sup>+</sup> cell engraftment in NSG mice.** Femoral aspirates were obtained at 12 weeks after transplantation and stained with a panel of human myeloid- and lymphocyte-specific antibodies followed by flow cytometry analysis. Bilineage engraftment with mCD45<sup>-</sup>hCD45<sup>+</sup>CD33<sup>+</sup>CD19<sup>-</sup>CD3<sup>-</sup> and mCD45<sup>-</sup>hCD45<sup>+</sup>CD33<sup>-</sup>CD19<sup>+</sup>CD3<sup>-</sup> cells demonstrates successful engraftment by normal CB-CD34<sup>+</sup> cells.



Figure. S6

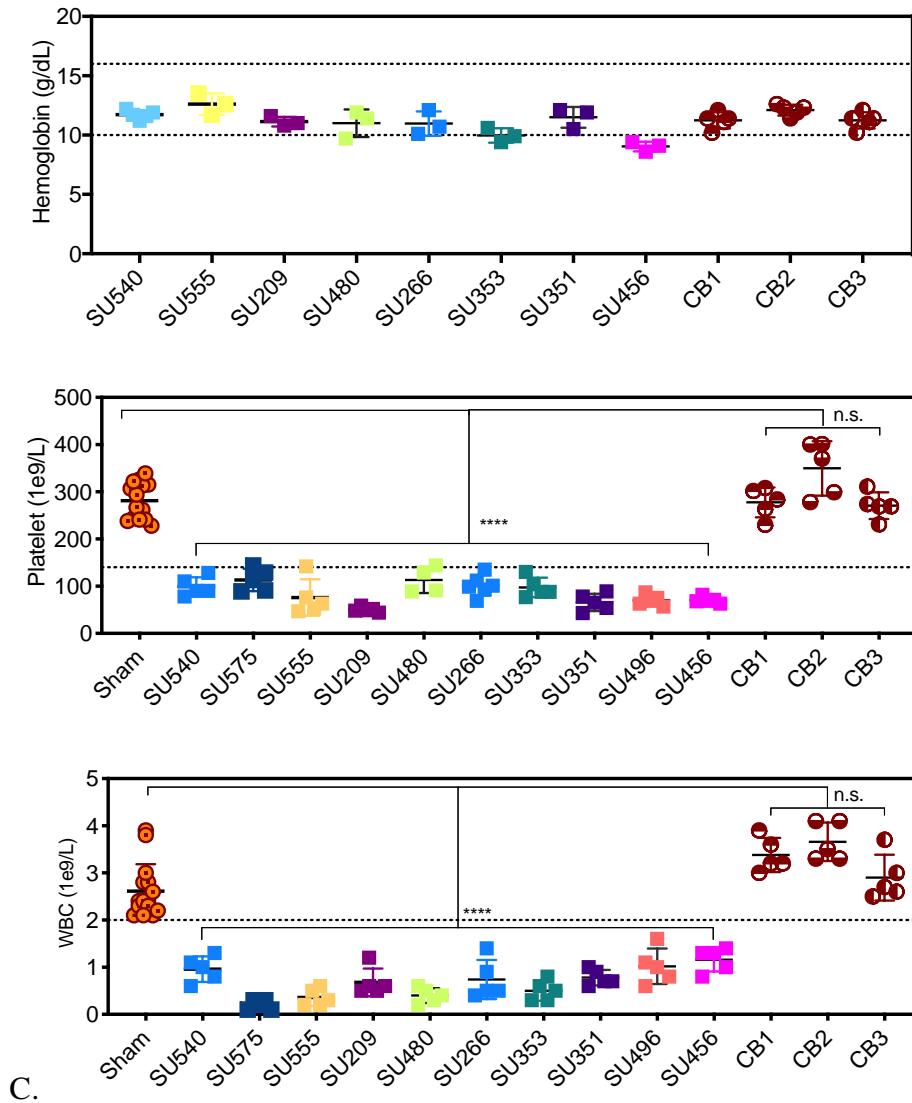

**Complete blood counts in NSG<sup>sham</sup> and NSG<sup>spIn-</sup> mice transplanted with primary AML**

**samples or normal CB-CD34<sup>+</sup> cells.** (A) NSG<sup>sham</sup> mice engrafted with primary AML or normal CB-CD34<sup>+</sup> cells do not develop BM failure up to 6 months (8-9 months of age) after transplantation. (B) Thrombocytopenia and (C) leukopenia develop in NSG<sup>spIn-</sup> mice engrafted with AML but not CB-CD34<sup>+</sup> HSPCs. All AML samples are color coded to reflect individual AML or CB samples reported in Figure 2D.

Fig. S7

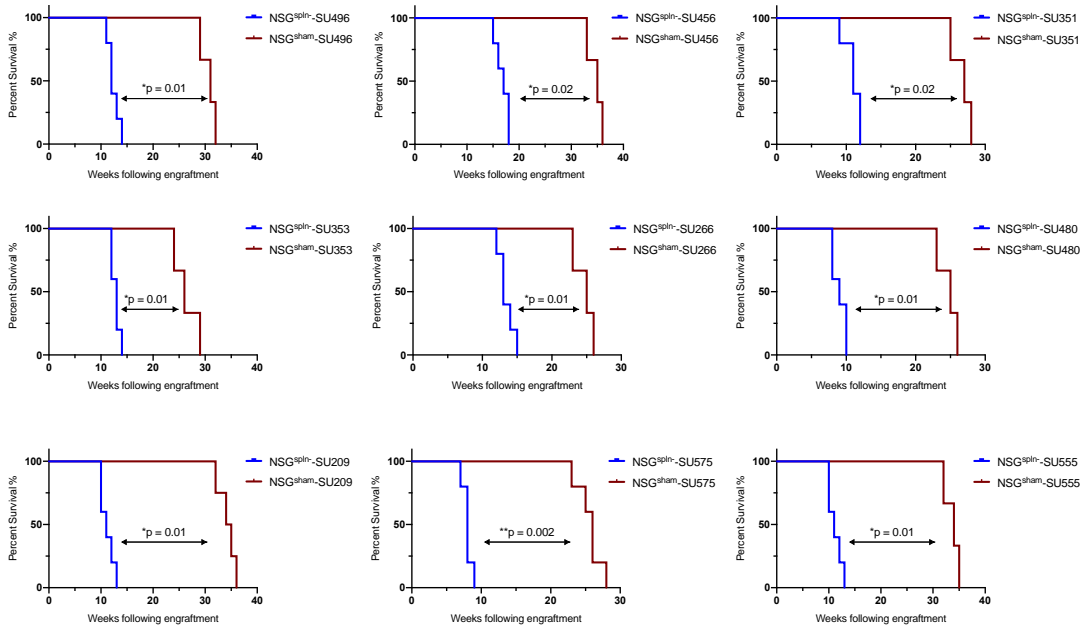

B.

| Sample ID | Median Survival (weeks) |      | P value |
|-----------|-------------------------|------|---------|
|           | Splenectomized          | Sham |         |
| SU540     | 9.5                     | 36   | 0.0001  |
| SU575     | 8                       | 26   | 0.0002  |
| SU555     | 11                      | 34   | 0.01    |
| SU209     | 11                      | 34   | 0.009   |
| SU480     | 9                       | 25   | 0.01    |
| SU266     | 13                      | 25   | 0.01    |
| SU353     | 13                      | 26   | 0.01    |
| SU351     | 11                      | 27   | 0.02    |
| SU496     | 12                      | 31   | 0.01    |
| SU456     | 17                      | 35   | 0.02    |

**Splenectomized NSG mice engrafted with human primary AML exhibit shortened survival.**

(A) Kaplan Meier curves indicating overall survival of NSG<sup>sham</sup> (n=3-5) and NSG<sup>spln</sup> (n=5) mice engrafted with 9 independent primary AML samples as indicated in each plot. (B) Summary of medial survival of each group of NSG<sup>sham</sup> and NSG<sup>spln</sup>. P values were calculated by log-rank test.

Fig. S8

A.

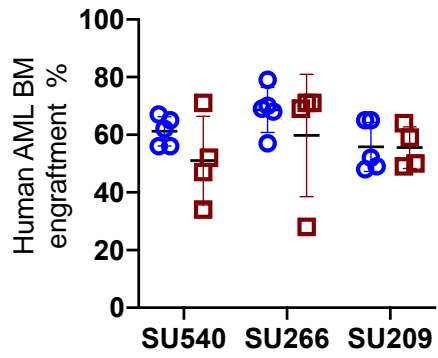

B.

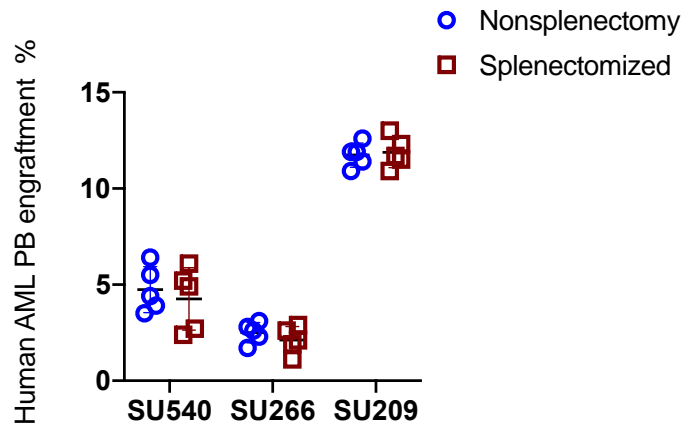

C.

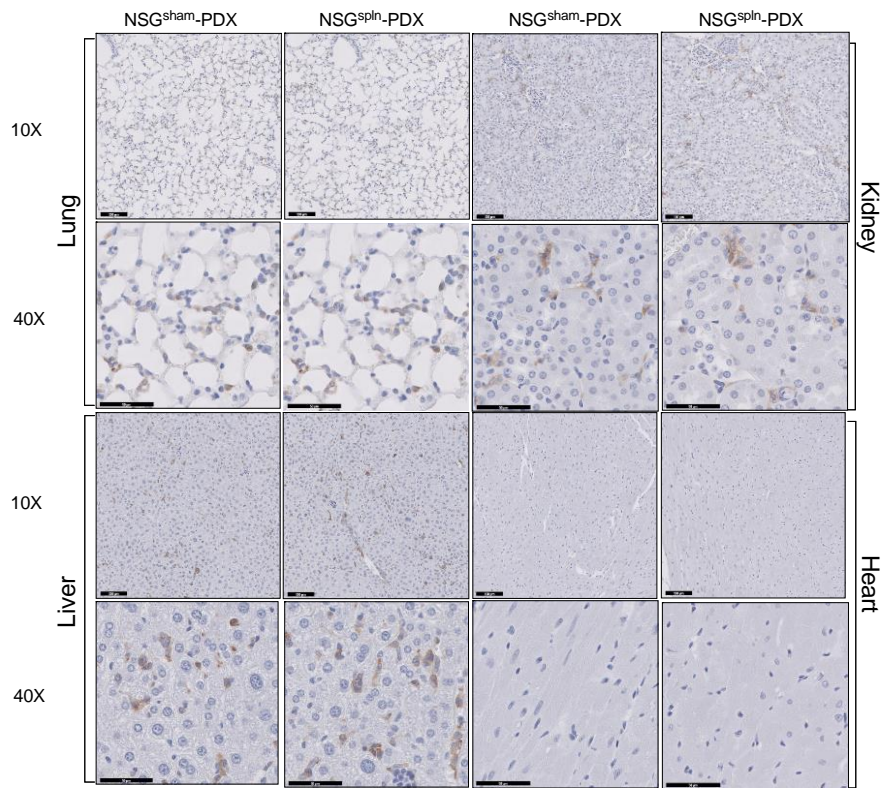

**Surgical splenectomy does not increase leukemic burden in NSG mice engrafted with**

**human AML.** Human AML disease burden in the (A) BM and (B) PB of NSG<sup>sham</sup> (n=5) and

NSG<sup>spIn-</sup> (n=5) mice engrafted with 3 independent primary AML samples. (C) Representative

IHC stain of human CD45 (brown) in the lung, kidney, liver, and heart to estimate organ

infiltration of human AML in NSG<sup>sham</sup> and NSG<sup>spIn-</sup> mice. Scale bars represent 100µm (10x top

panel) and 50 µm (40x bottom panel).

Fig. S9

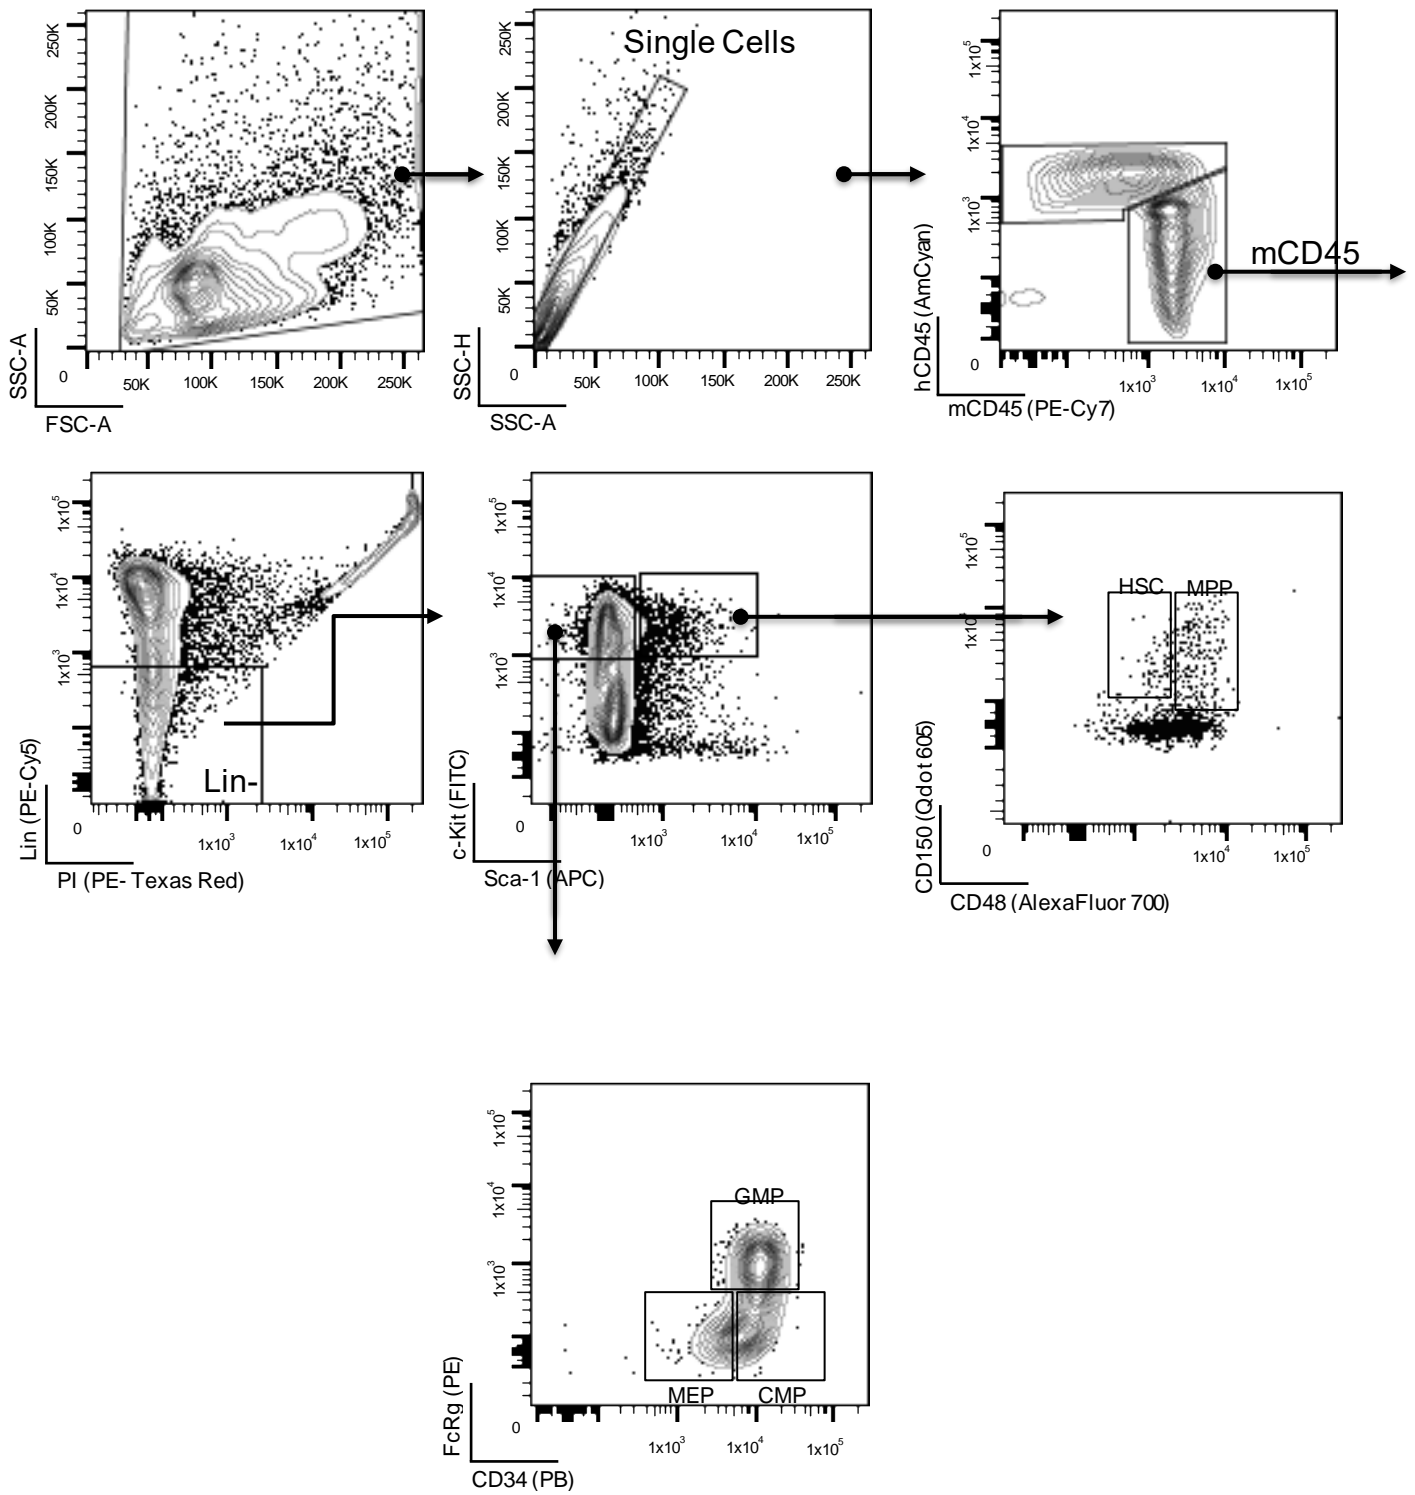

**Representative flow plots for the evaluation of mouse hematopoietic stem and progenitor cells in NSG<sup>spln</sup>-PDX mice.** Splenectomized NSG mice transplanted with human AML blasts or normal human CB-CD34<sup>+</sup> cells were euthanized at pre-determined time points and mononuclear cell fractions prepared as described. An aliquot of the cells from each mouse was stained with a panel of antibodies designed to evaluate various progenitor populations.

Fig. S10

A.

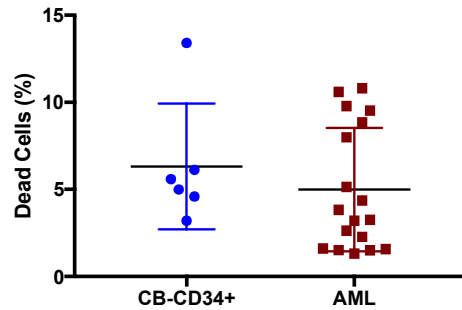

B.

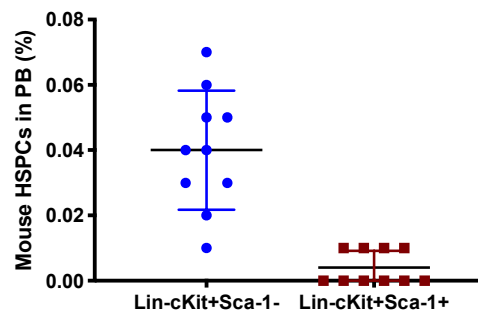

**Mouse HSPCs in NSG<sup>spln-</sup>-PDX mice do not exhibit increased apoptosis/cell death or displacement into PB.** (A). The annexin V<sup>+</sup>/PI<sup>+</sup> fractions of HSPCs from mononuclear cell fractions of each mouse in Figure 3B-F were used to determine the degree of apoptosis/cell death. (B). The frequency of mouse HSPCs in the PB of NSG<sup>spln-</sup>-PDX mice was determined at 12 weeks following engraftment.

Fig. S11

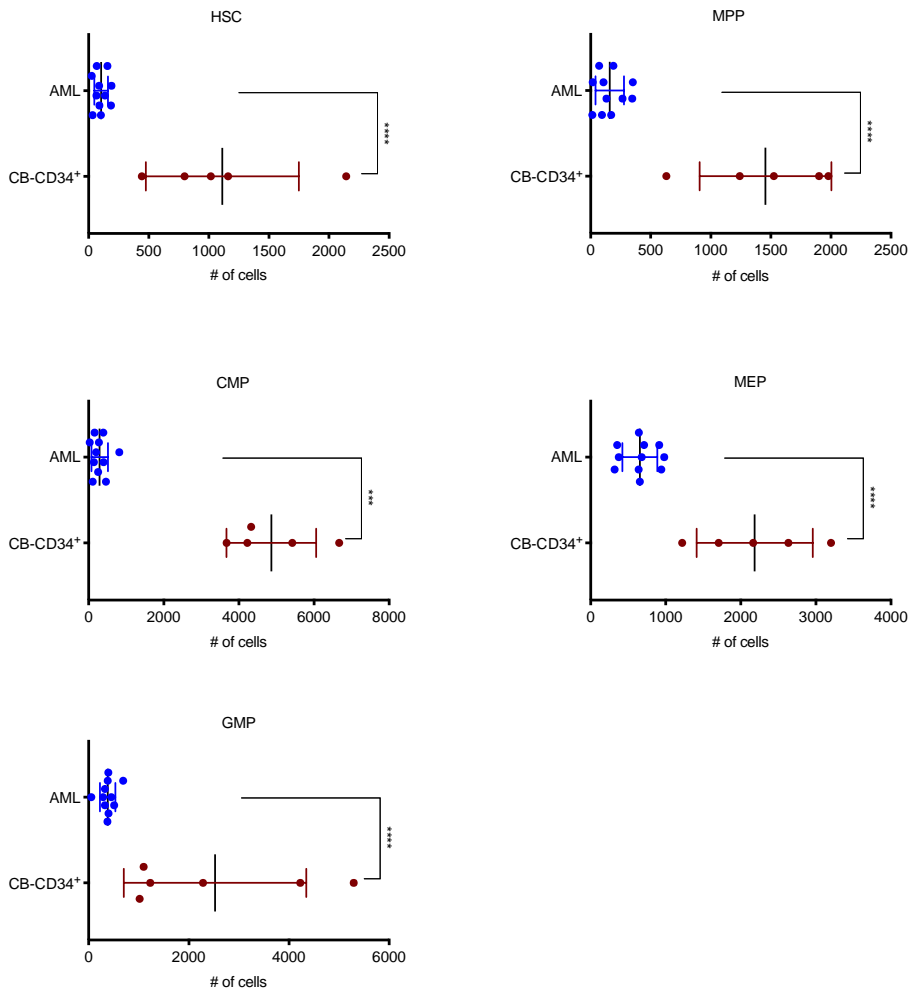

**Mouse hematopoietic stem and progenitor cells are similarly depleted in NSG<sup>sham</sup>-PDX mice.** Absolute numbers of HSC (AML 103±25.6 vs CB 1112±185; p<0.0001), MPP (AML 160±37 vs CB 1456±167; p<0.001), CMP (AML 293±35.8 vs CB 4864±358; p<0.0001), MEP (AML 657±35.6 vs CB 2186±247; p<0.0001), and GMP (AML 381±47 vs CB 2525±538; p<0.0012) in NSG<sup>sham</sup>-PDX (n=5) or NSG<sup>sham</sup>-CB-CD34<sup>+</sup> (n=5) mice 8 weeks after transplantation.



Fig. S12

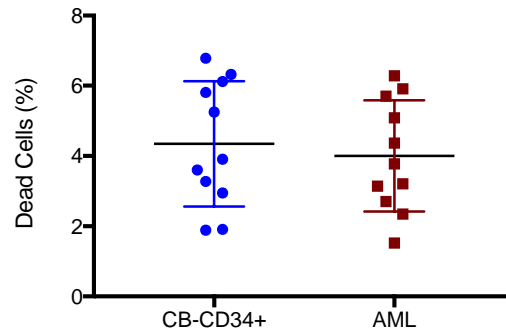

**Mouse proerythroblasts in NSG<sup>spln-</sup>-PDX mice exhibit similar levels of apoptosis/cell death.**

(A). The percentages of annexin V<sup>+</sup>/PI<sup>+</sup> proerythroblasts from each mononuclear cell fractions of each mouse in Figure 3M-P were used to determine the degree of apoptosis/cell death.

Fig. S13.

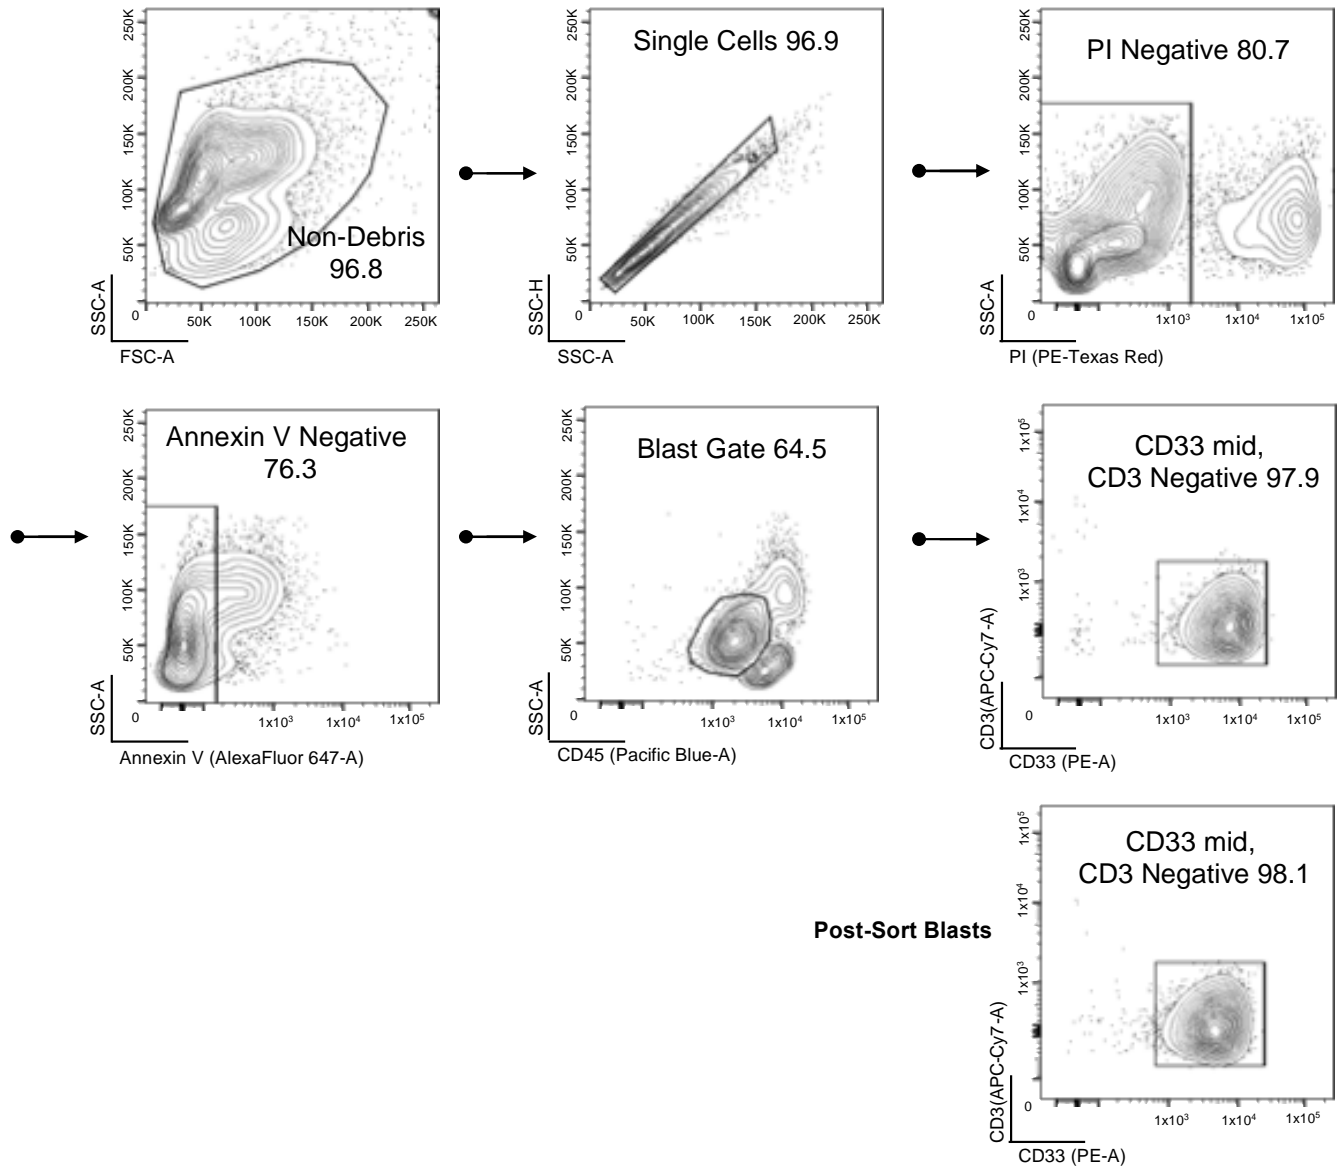

**Representative markers and gating strategy used to sort purified populations of human AML blasts.** Patient samples were stained to identify human AML blasts expressing  $CD45^{mid/low}CD33^{mid}CD3^{-}$ . Blast cells were sorted and post-sort analysis was conducted to assess purity.

Fig. S14.

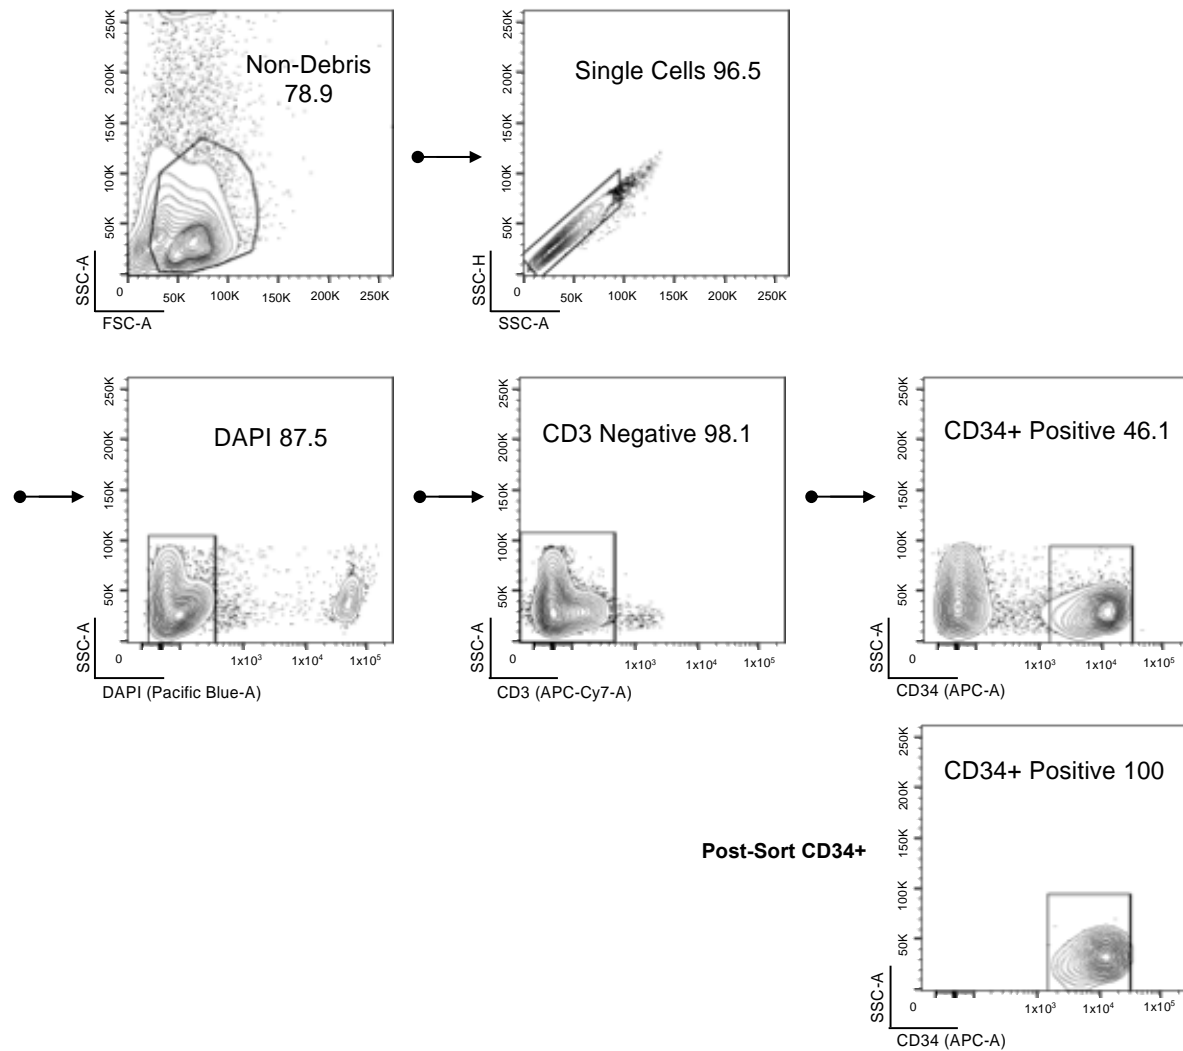

**Representative markers and gating strategy used to sort purified populations of human CB-CD34<sup>+</sup> cells.** Cord blood was enriched for CD34<sup>+</sup> cells using positive magnetic selection, and cells were stained using antibodies specific for hCD3 and hCD34 to isolate purified populations of CB-CD34<sup>+</sup> progenitors by flow cytometry. A post-sort analysis was conducted to assess purity.

Fig. S15. Viability of primary AML cells.

A.

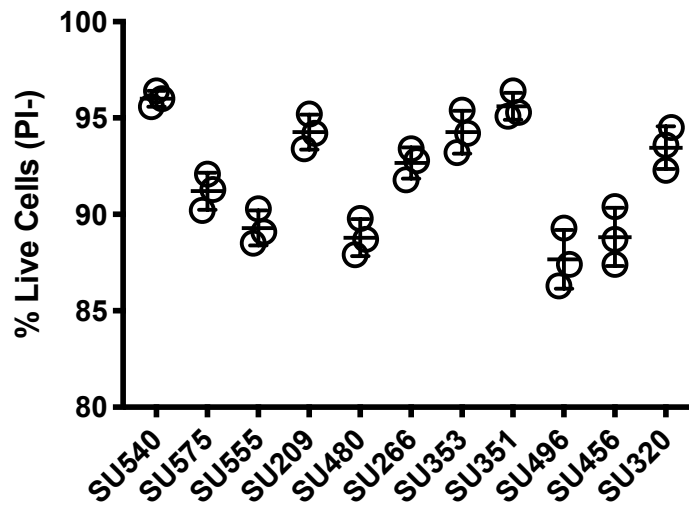

B.

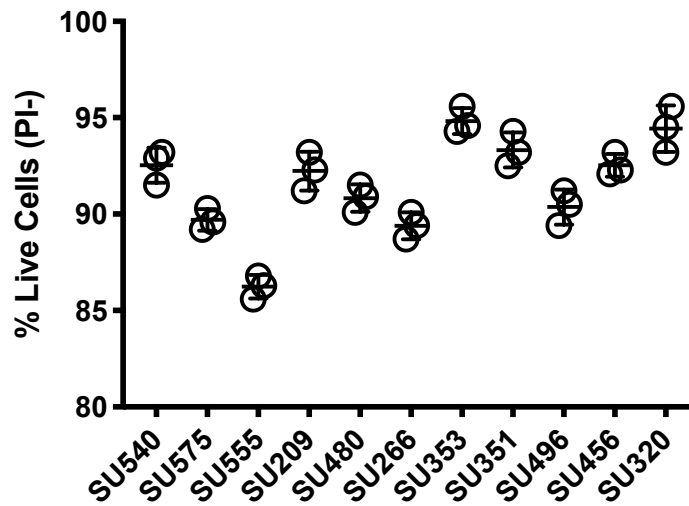

**Viability of human AML in culture.** (A) Percentages of live (PI<sup>-</sup>) human AML cells in culture (14-21 days). (B) Percentages of live (PI<sup>-</sup>) human AML blasts flow purified as described at the end of 72 h culture in SFEM supplemented with TPO, SCF, and FLT3L for generation of conditioned medium.

Fig. S16.

A.

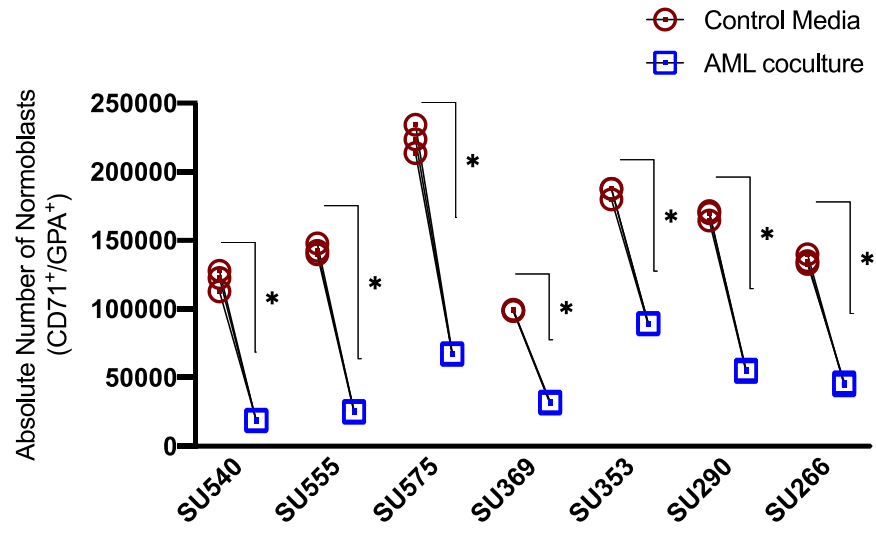

B.

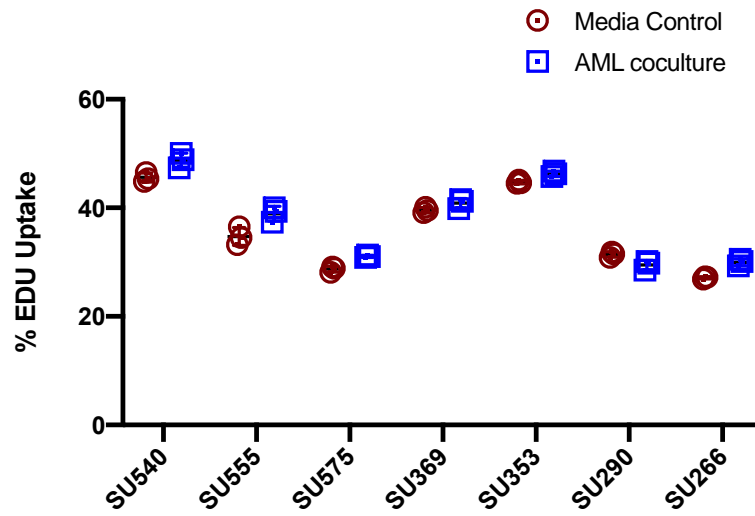

C.

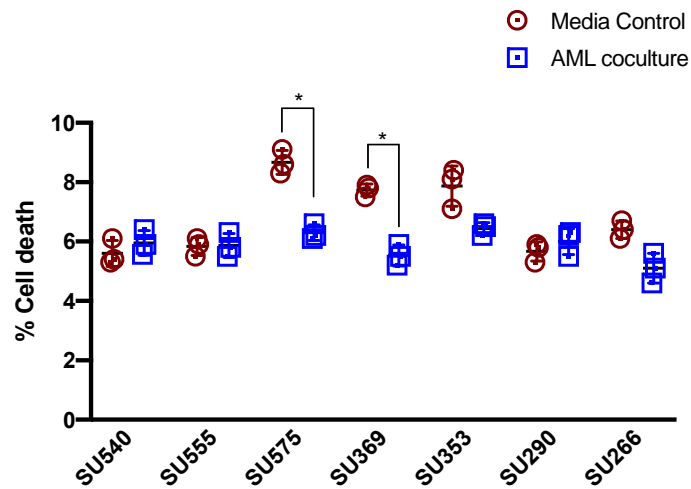

**Human AML blasts do not block erythroid differentiation by inhibition of cell cycle entry or induction of cell death.** (A) Absolute number of CD71<sup>+</sup>/GPA<sup>+</sup> normoblasts in culture on day 6 of the transwell assay in the absence or presence of purified AML blasts. \*p<0.01 by unpaired t-test. (B) Percentage of EDU<sup>+</sup> or (C) PI<sup>+</sup> CB-CD34<sup>+</sup> cells in the transwell assay in the absence or presence of purified AML blasts. \*p<0.05 by unpaired t-test.

Fig. S17.

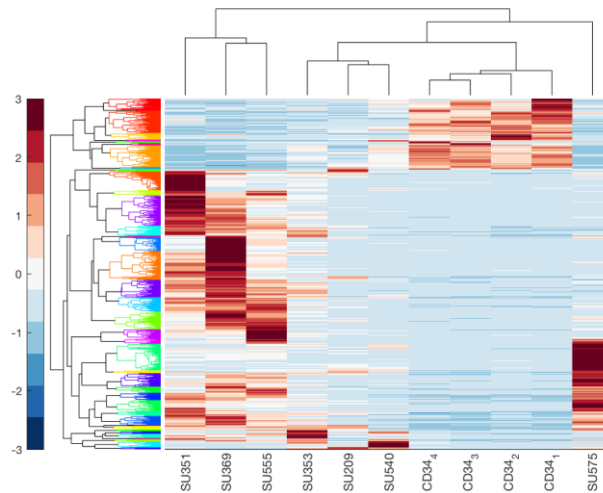

B.

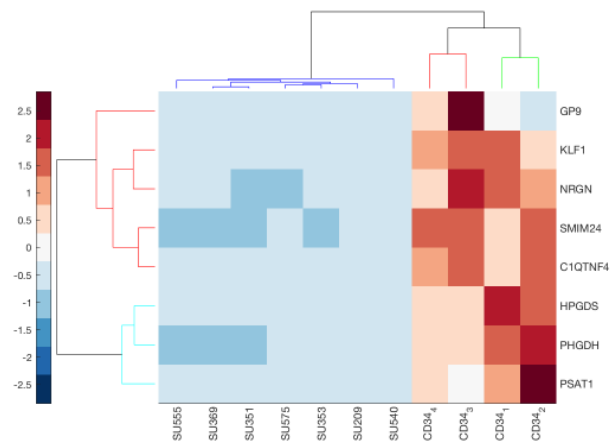

**RNA-Seq of purified populations of human AML blasts and CB-CD34<sup>+</sup> cells shows an inflammatory transcriptome signature in AML.** (A) Heatmap representation of unsupervised hierarchical clustering of the differentially expressed transcripts between purified populations of primary human AML blasts (n=7) and normal CB-CD34<sup>+</sup> cells (n=4). (B) Heatmap of the transcripts whose expression was down regulated at least 8 fold ( $p < 0.00005$ ) in AML blasts compared to normal CB-CD34<sup>+</sup> cells.

Fig. S18.

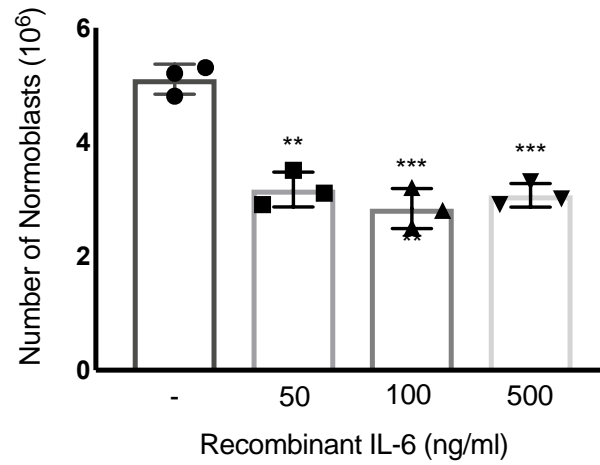

**Effects of the addition of recombinant human IL-6 on normal CB-CD34<sup>+</sup> progenitors undergoing erythroid differentiation.** Recombinant human IL-6 (0-500 ng/ml) was added to triplicate liquid cultures containing normal human CD34<sup>+</sup> progenitors (n=3 CB-CD34<sup>+</sup> cells from independent donors) in EPO, IL-3, and SCF. The number of CD71<sup>+</sup>GPA<sup>+</sup> cells was determined by flow cytometry on day 6 of culture.



Figure S19

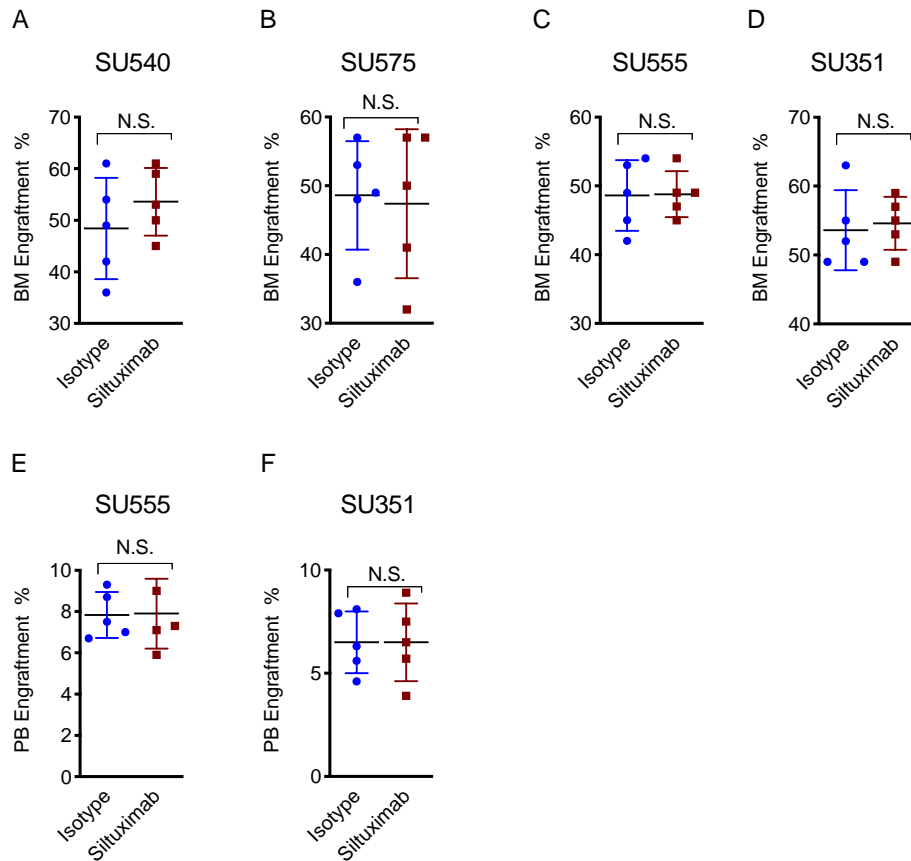

**Siltuximab treatment does not decrease leukemic burden in NSG<sup>spln</sup>- mice engrafted with human AML.** NSG<sup>spln</sup>- mice were engrafted with indicated human AML samples. Control antibody and siltuximab treatment began on day 3 after engraftment and continued every 72 hours until the end of the experiment. Human AML disease burden was examined at week 6-8 in the BM of NSG<sup>spln</sup>- mice engrafted with (A) SU540, (B) SU575, (C) SU555, (D) SU351. AML burden was assessed in the PB of NSG<sup>spln</sup>- mice engrafted with (E) SU555 and (F) SU351. N.S. = not significant. N = 5 for all experiments above.

Figure S20

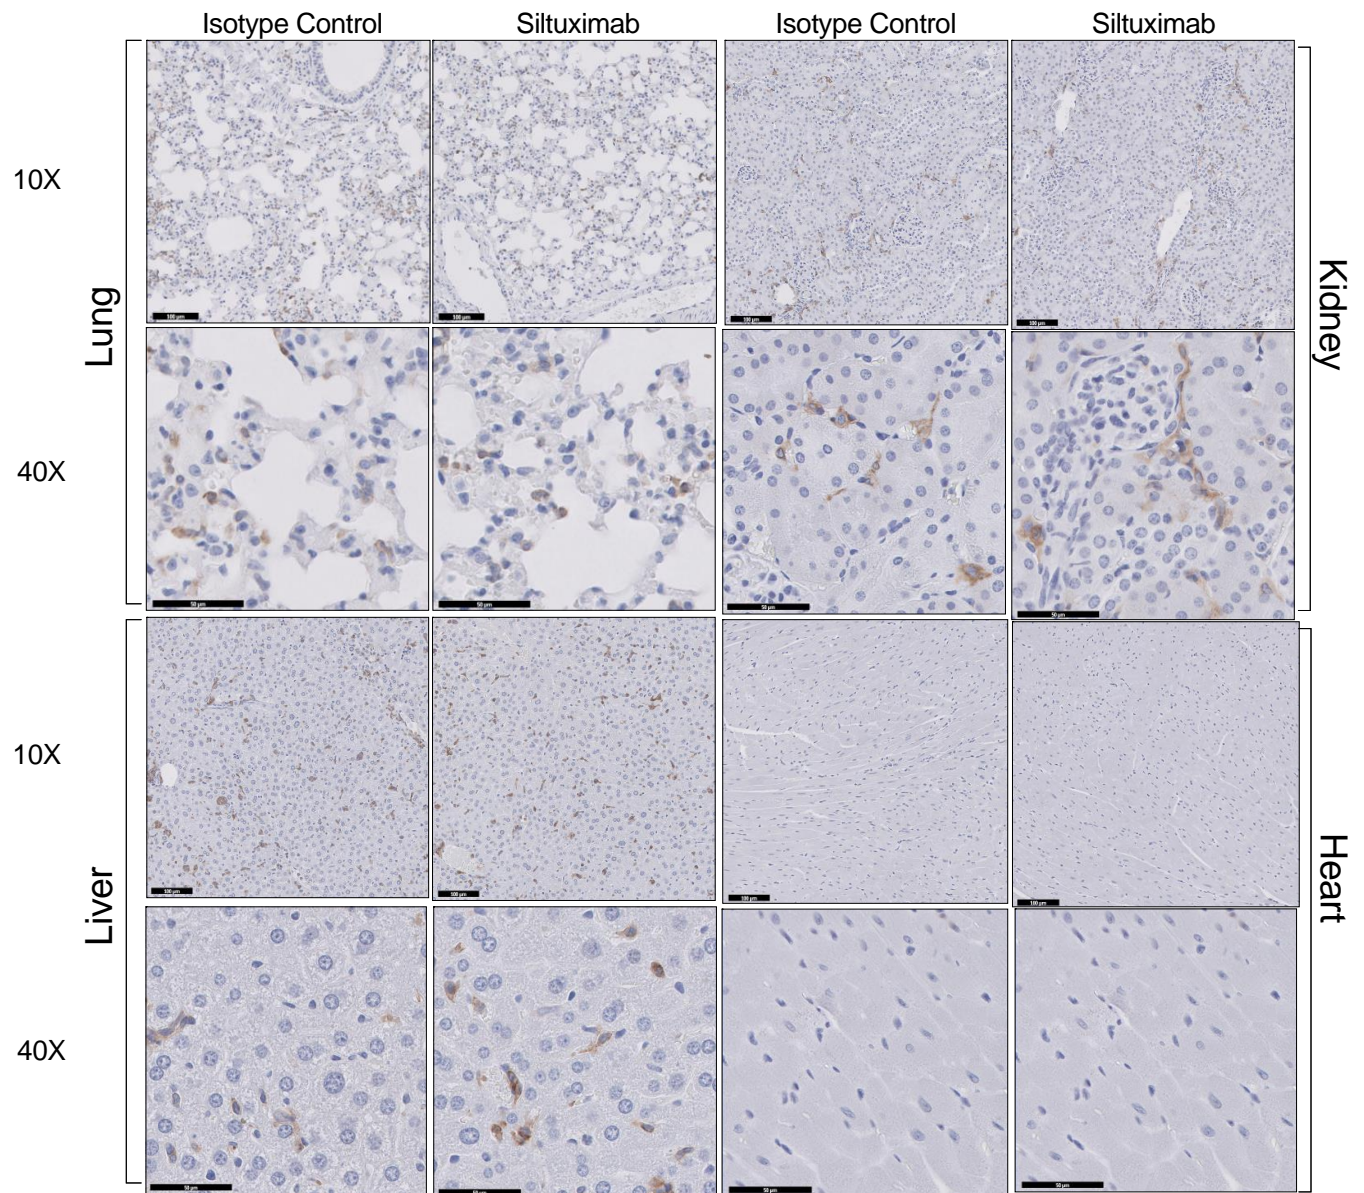

**Siltuximab treatment does not decrease leukemic burden in various organs of NSG<sup>spln</sup>- mice engrafted with human AML.** Representative IHC stain of human CD45 (brown) in the lung, kidney, liver, and heart to evaluate organ infiltration by human AML in NSG<sup>spln</sup>-PDX (SU540) mice treated with isotype control (n=5) or siltuximab (n=5) as described. Scale bars represent 100 $\mu$ m (10x top panel) and 50  $\mu$ m (40x bottom panel).

Figure S21

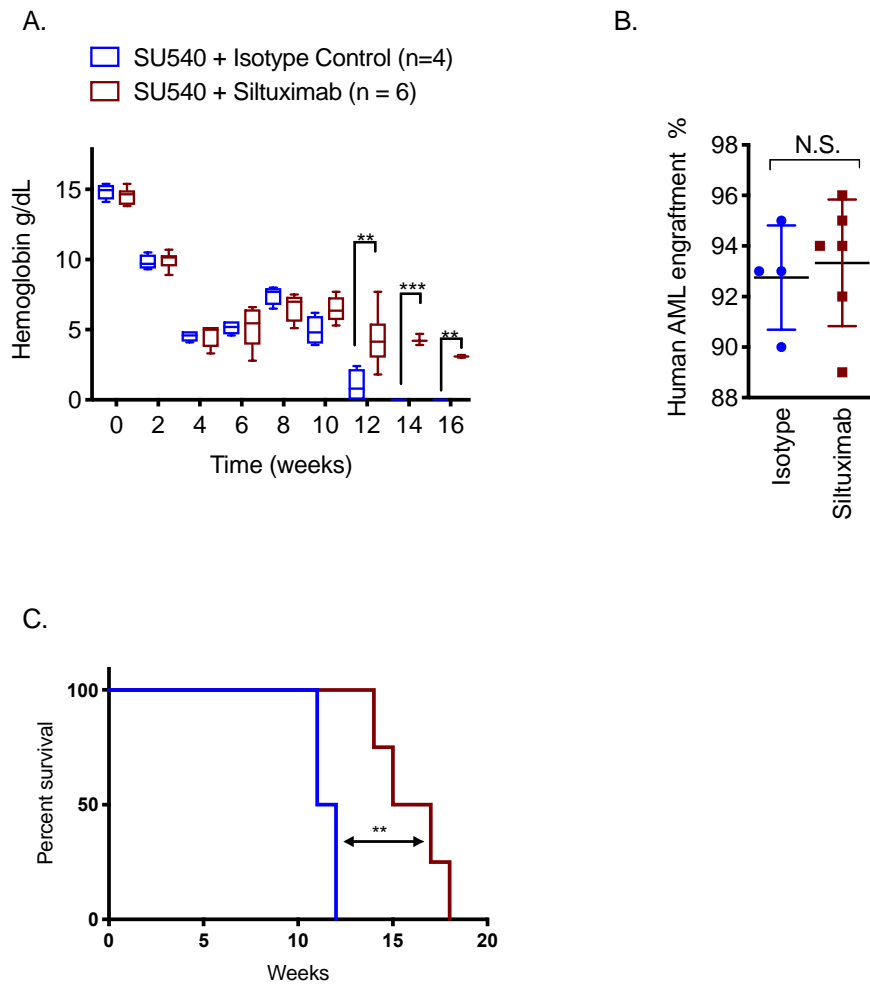

**Siltuximab treatment initiated after establishment of disease also improves anemia and overall survival in human AML xenografts.** NSG<sup>spIn-</sup>-PDX mice engrafted with SU540 were treated with control antibody or siltuximab (20 mg/kg) every 3 days starting on day 21. (A) The decline in hemoglobin was delayed in the siltuximab treatment group (\*\*p<0.01, \*\*\*p<0.001, unpaired t-test). (B) BM leukemic burden (hCD45<sup>+</sup>CD33<sup>+</sup>) was similar between treatment groups. N.S.= not significant. (C) Overall survival was improved with siltuximab treatment (11.5 weeks vs 14.5 weeks, \*\*p=0.003, log rank test).

Fig. S22

A.

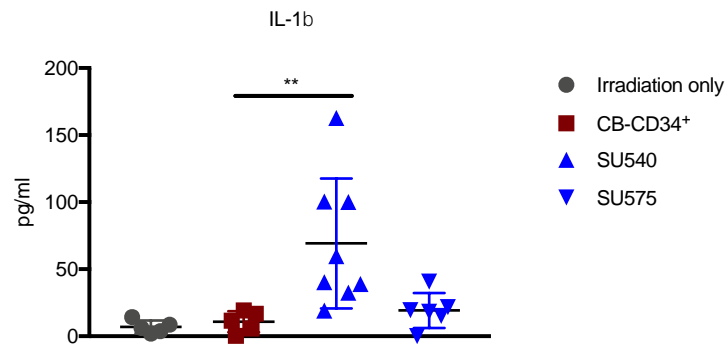

B.

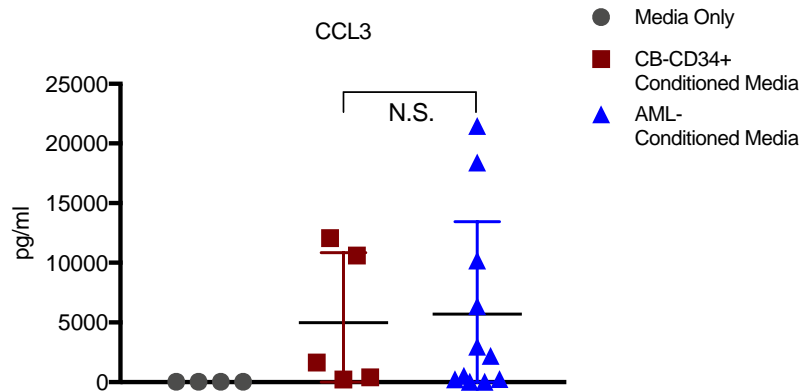

### IL-1 $\beta$ and CCL3 production in NSG<sup>spln</sup>-PDX mice and AML conditioned medium

(A) IL-1 $\beta$  concentrations in the BM plasma of splenectomized NSG mice engrafted with SU540 and SU575 determined by multiplex protein array (n = 15) compared to similar mice engrafted with CB-CD34<sup>+</sup> cells (n=5) or irradiated only control mice (n=4). \*\*p<0.01 unpaired t-test. (B) CCL3 production by purified primary AML blasts (n = 10) in culture determined by multiplex protein array compared to CB-CD34<sup>+</sup> cells (n=5) and medium only control (n=4) N.S.=not significant.

Table S1.

| <b>Stanford Cancer Center</b>                                           |                       |
|-------------------------------------------------------------------------|-----------------------|
| <b>Number of Patients</b>                                               | 293                   |
| <b>Time of Diagnosis</b>                                                | 2011-2014             |
| <b>Age (yrs)</b><br>Mean (SD)<br>Median                                 | 63 (16)<br>67 (21-89) |
| <b>Sex</b><br>Male<br>Female                                            | 169<br>124            |
| <b>Risk Category (2017 ELN)</b><br>Favorable<br>Intermediate<br>Adverse | 14<br>153<br>126      |

**Summary of patient characteristics whose clinical data were included for analysis in Figure**

**1A-D** ELN: European Leukemia Net risk category

Table S2.

| <b>Campbell et al</b>                                                   |                           |
|-------------------------------------------------------------------------|---------------------------|
| <b>Number of Patients</b>                                               | 1,376                     |
| <b>Time of Diagnosis</b>                                                | 2005-2015                 |
| <b>Age (yrs)</b><br>Mean (SD)<br>Median                                 | 47.8 (12.3)<br>49 (18-84) |
| <b>Sex</b><br>Male<br>Female                                            | 740<br>636                |
| <b>Risk Category (2017 ELN)</b><br>Favorable<br>Intermediate<br>Adverse | 195<br>867<br>204         |

**Summary of patient characteristics whose clinical data were included for analysis in figures**

**S1 and S2.** ELN: European Leukemia Net risk category

Figure S3

| Sample | Sex | Age | Type              | ELN     | FAB | CG               | Somatic Mutation                                 | WBC   | HGB  | PLT |
|--------|-----|-----|-------------------|---------|-----|------------------|--------------------------------------------------|-------|------|-----|
| SU209  | F   | 66  | de novo           | INT     | M2  | 46XY             | NPM1, FLT3, NOTCH2                               | 166   | 8.8  | 133 |
| SU266  | M   | 65  | de novo           | Adverse | -   | Inv(3)           | SETD2, TET2, AK2, ASXL1, FLT3-ITD                | 374   | 9.9  | 36  |
| SU351  | M   | 75  | secondary MDS-AML | Adverse | M5  | Complex          | IDH2, NRAS, BCORL1, SETD                         | 3.2   | 9.7  | 26  |
| SU353  | M   | 66  | de novo           | INT     | M4  | 46XY             | NPM1, FLT3-ITD, DNMT3A,                          | 111   | 9.6  | 73  |
| SU456  | M   | 55  | secondary MDS-AML | Adverse | -   | Complex          | NRAS, TP53                                       | 1.8   | 7.6  | 146 |
| SU480  | F   | 64  | de novo           | INT     | M1  | 46XX             | CEPBA, FLT3-ITD, DNMT3A, TET2, BCOR, ZRSR2, TET2 | 16.9  | 7.4  | 112 |
| SU496  | M   | 24  | de novo           | INT     | -   | (+) <sup>8</sup> | TP53, IDH2, DNMT3A, STAG2, BCOR, ZRSR2, TET2     | 35.4  | 10.3 | 44  |
| SU540  | F   | 68  | de novo           | INT     | -   | 46XX             | DNMT3A, MYC, CEPBA, NPM1, FLT3-ITD, TET2         | 94.4  | 5.6  | 189 |
| SU555  | F   | 27  | de novo           | INT     | -   | -                | PTPN11, SETD2, MTND5                             | 103.2 | 7.5  | 28  |
| SU575  | M   | 72  | secondary MDS-AML | INT     | -   | 46XY             | NPM1, FLT3-ITD, DNMT2, ZRSR2, JAK3               | 28.4  | 8.3  | 23  |

**Patient and disease-specific characteristics of human AML samples investigated here.**

ELN: European Leukemia Net risk category; FAB: French-American-British AML classification; CG: cytogenetics; WBC: white blood cell ( $10^3/\mu\text{l}$ ); HGB: hemoglobin (g/dL); PLT: platelet ( $10^3/\mu\text{L}$ ).

Table S4.

|                 | <b>GM</b> | <b>M</b> | <b>G</b> | <b>GEMM</b> | <b>BFU</b> |
|-----------------|-----------|----------|----------|-------------|------------|
| <b>Media</b>    | 14        | 15       | 21       | 23          | 69         |
| <b>CB-CD34+</b> | 21        | 8        | 44       | 22          | 83         |
| <b>CB-CD34+</b> | 20        | 5        | 39       | 21          | 55         |
| <b>CB-CD34+</b> | 10        | 5        | 29       | 14          | 65         |
| <b>CB-CD34+</b> | 15        | 5        | 27       | 16          | 65         |
| <b>CB-CD34+</b> | 16        | 4        | 35       | 19          | 69         |
| <b>CB-CD34+</b> | 17        | 6        | 33       | 19          | 72         |
| <b>CB-CD34+</b> | 13        | 4        | 43       | 20          | 59         |
| <b>SU540</b>    | 6         | 5        | 36       | 16          | 35         |
| <b>SU575</b>    | 9         | 12       | 38       | 16          | 37         |
| <b>SU555</b>    | 10        | 6        | 35       | 17          | 19         |
| <b>SU209</b>    | 8         | 16       | 33       | 16          | 35         |
| <b>SU480</b>    | 11        | 14       | 28       | 15          | 32         |
| <b>SU266</b>    | 11        | 11       | 32       | 15          | 38         |
| <b>SU353</b>    | 9         | 8        | 27       | 15          | 43         |
| <b>SU351</b>    | 8         | 11       | 64       | 18          | 37         |
| <b>SU496</b>    | 9         | 9        | 33       | 17          | 29         |
| <b>SU456</b>    | 8         | 7        | 31       | 15          | 42         |

**Human AML conditioned medium suppresses mouse progenitor colony formation.** Number of mouse erythroid and myeloid colonies formed in the presence of control or AML-CM as presented in Figure 4B. All numbers are average values of technical triplicates.



Table S5.

|                 | <b>GM</b> | <b>M</b> | <b>G</b> | <b>GEMM</b> | <b>BFU</b> |
|-----------------|-----------|----------|----------|-------------|------------|
| <b>Media</b>    | 14        | 15       | 21       | 23          | 69         |
| <b>CB-CD34+</b> | 21        | 8        | 44       | 22          | 83         |
| <b>CB-CD34+</b> | 20        | 5        | 39       | 21          | 55         |
| <b>CB-CD34+</b> | 10        | 5        | 29       | 14          | 65         |
| <b>SU540</b>    | 6         | 5        | 36       | 16          | 37         |
| <b>SU575</b>    | 9         | 12       | 38       | 16          | 37         |
| <b>SU555</b>    | 10        | 6        | 35       | 17          | 19         |
| <b>SU209</b>    | 8         | 16       | 33       | 16          | 35         |
| <b>SU480</b>    | 11        | 14       | 28       | 15          | 38         |
| <b>SU369</b>    | 11        | 11       | 32       | 15          | 38         |
| <b>SU456</b>    | 9         | 8        | 27       | 15          | 43         |
| <b>SU351</b>    | 8         | 11       | 64       | 18          | 37         |

**Human AML-CM suppresses human progenitor colony formation.** Number of human erythroid and myeloid colonies formed in the presence of control or AML-CM as presented in Figure 4D. All numbers are average values of technical triplicates.
