# Supplementary material
Source: PubMed Central journal article supplement (PMC7266679)
Supplement: NIHMS1584831-supplement-S4.pdf [file NIHMS1584831-supplement-S4.pdf]

Figure. S4.

A.

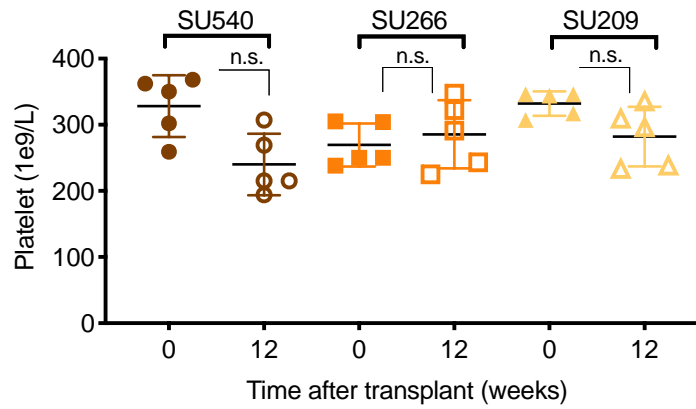

B.

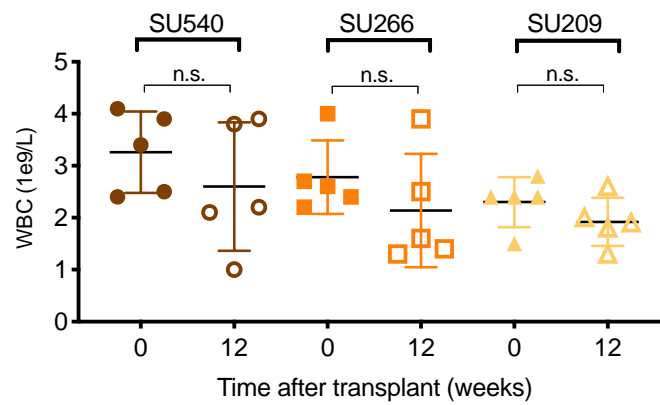

**Conventional NSG AML xenografts do not develop BM failure evidenced by lack of cytopenias.** (A) Platelet and (B) WBC count was measured via tail vein every two weeks, and results at 12 weeks are shown (n.s. = not significant).
