# Supplementary material
Source: PubMed Central journal article supplement (PMC7266679)
Supplement: NIHMS1584831-supplement-S5.pdf [file NIHMS1584831-supplement-S5.pdf]

Fig. S5

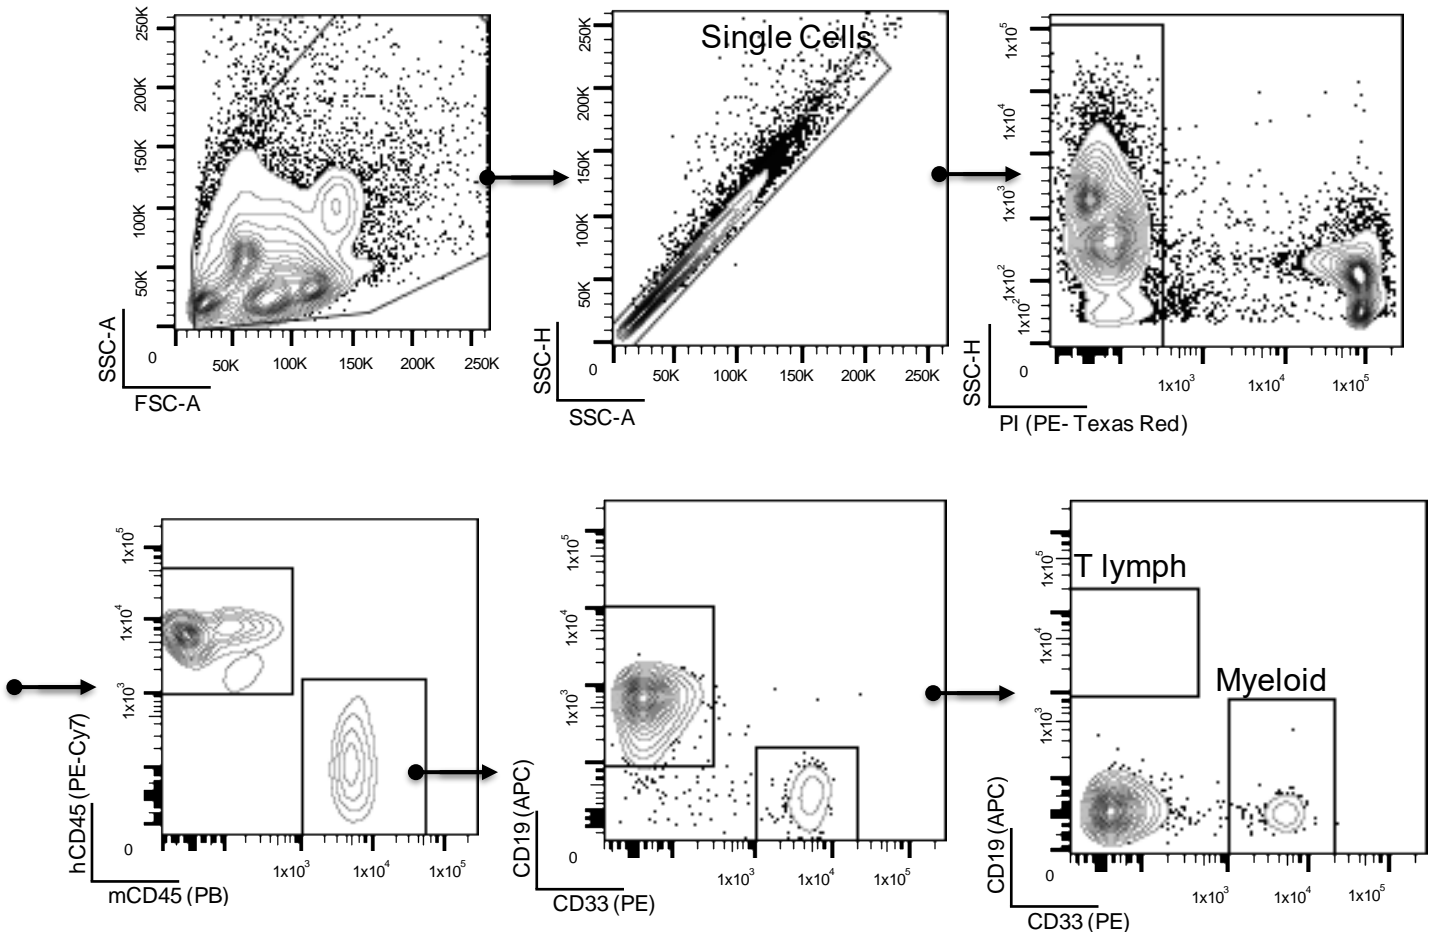

**Representative markers and gating strategy to determine human normal CB-CD34<sup>+</sup> cell engraftment in NSG mice.** Femoral aspirates were obtained at 12 weeks after transplantation and stained with a panel of human myeloid- and lymphocyte-specific antibodies followed by flow cytometry analysis. Bilineage engraftment with mCD45<sup>-</sup>hCD45<sup>+</sup>CD33<sup>+</sup>CD19<sup>-</sup>CD3<sup>-</sup> and mCD45<sup>-</sup>hCD45<sup>+</sup>CD33<sup>-</sup>CD19<sup>+</sup>CD3<sup>-</sup> cells demonstrates successful engraftment by normal CB-CD34<sup>+</sup> cells.
