# Supplementary material
Source: PubMed Central journal article supplement (PMC7266679)
Supplement: NIHMS1584831-supplement-S6.pdf [file NIHMS1584831-supplement-S6.pdf]

Figure. S6

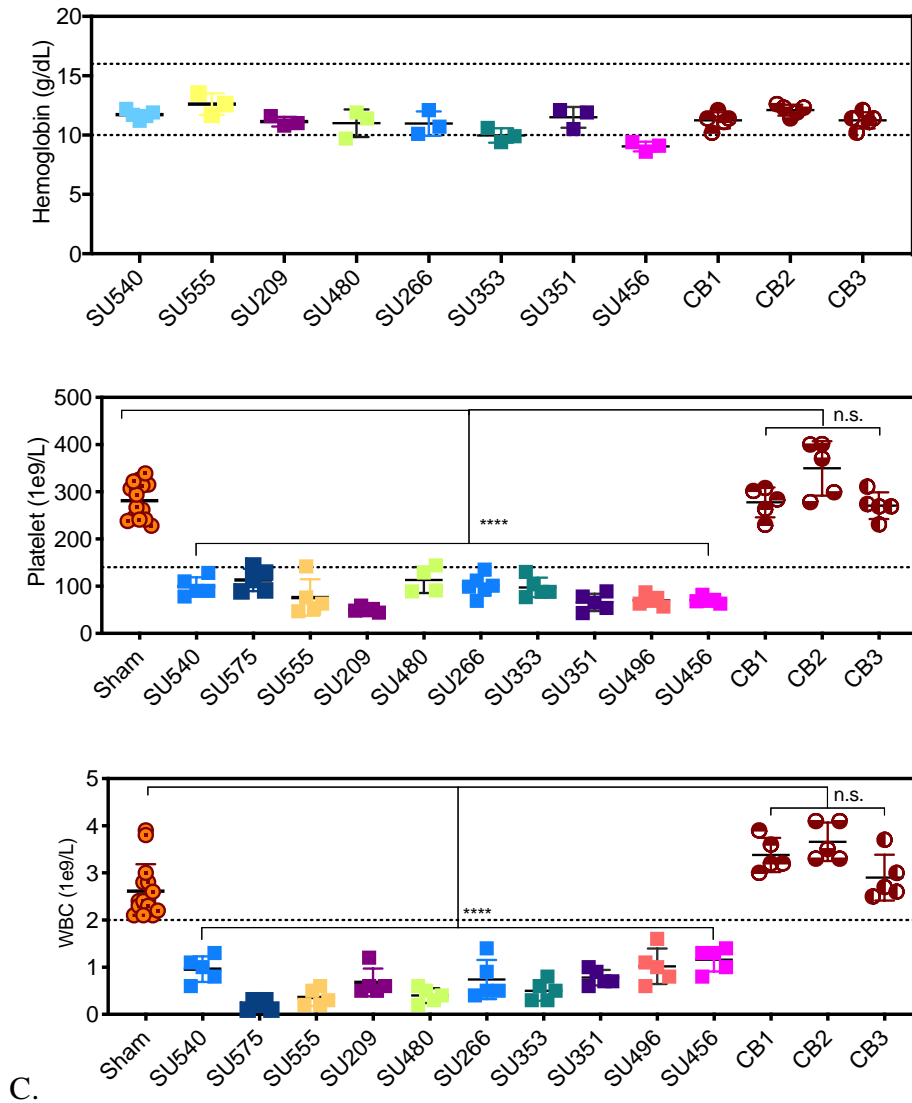

**Complete blood counts in NSG<sup>sham</sup> and NSG<sup>spIn-</sup> mice transplanted with primary AML**

**samples or normal CB-CD34<sup>+</sup> cells.** (A) NSG<sup>sham</sup> mice engrafted with primary AML or normal CB-CD34<sup>+</sup> cells do not develop BM failure up to 6 months (8-9 months of age) after transplantation. (B) Thrombocytopenia and (C) leukopenia develop in NSG<sup>spIn-</sup> mice engrafted with AML but not CB-CD34<sup>+</sup> HSPCs. All AML samples are color coded to reflect individual AML or CB samples reported in Figure 2D.
