# Supplementary material
Source: PubMed Central journal article supplement (PMC7266679)
Supplement: NIHMS1584831-supplement-S7.pdf [file NIHMS1584831-supplement-S7.pdf]

Fig. S7

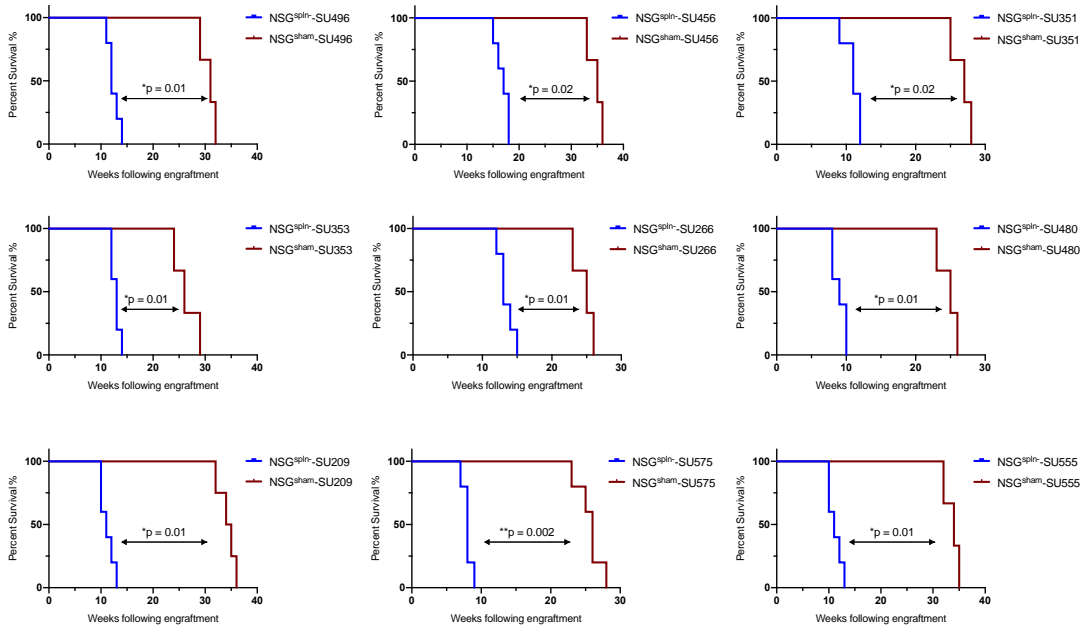

B.

| Sample ID | Median Survival (weeks) |      | P value |
|-----------|-------------------------|------|---------|
|           | Splenectomized          | Sham |         |
| SU540     | 9.5                     | 36   | 0.0001  |
| SU575     | 8                       | 26   | 0.0002  |
| SU555     | 11                      | 34   | 0.01    |
| SU209     | 11                      | 34   | 0.009   |
| SU480     | 9                       | 25   | 0.01    |
| SU266     | 13                      | 25   | 0.01    |
| SU353     | 13                      | 26   | 0.01    |
| SU351     | 11                      | 27   | 0.02    |
| SU496     | 12                      | 31   | 0.01    |
| SU456     | 17                      | 35   | 0.02    |

**Splenectomized NSG mice engrafted with human primary AML exhibit shortened survival.**

(A) Kaplan Meier curves indicating overall survival of NSG<sup>sham</sup> (n=3-5) and NSG<sup>spln-</sup> (n=5) mice engrafted with 9 independent primary AML samples as indicated in each plot. (B) Summary of medial survival of each group of NSG<sup>sham</sup> and NSG<sup>spln-</sup>. P values were calculated by log-rank test.
