# Supplementary material
Source: PubMed Central journal article supplement (PMC7266679)
Supplement: NIHMS1584831-supplement-S8_b_.pdf [file NIHMS1584831-supplement-S8_b_.pdf]

**Surgical splenectomy does not increase leukemic burden in NSG mice engrafted with**

**human AML.** Human AML disease burden in the (A) BM and (B) PB of NSG<sup>sham</sup> (n=5) and

NSG<sup>spIn-</sup> (n=5) mice engrafted with 3 independent primary AML samples. (C) Representative

IHC stain of human CD45 (brown) in the lung, kidney, liver, and heart to estimate organ

infiltration of human AML in NSG<sup>sham</sup> and NSG<sup>spIn-</sup> mice. Scale bars represent 100µm (10x top

panel) and 50 µm (40x bottom panel).
