# Supplementary material
Source: PubMed Central journal article supplement (PMC7266679)
Supplement: NIHMS1584831-supplement-S9_b_.pdf [file NIHMS1584831-supplement-S9_b_.pdf]

**Representative flow plots for the evaluation of mouse hematopoietic stem and progenitor cells in NSG<sup>spln</sup>-PDX mice.** Splenectomized NSG mice transplanted with human AML blasts or normal human CB-CD34<sup>+</sup> cells were euthanized at pre-determined time points and mononuclear cell fractions prepared as described. An aliquot of the cells from each mouse was stained with a panel of antibodies designed to evaluate various progenitor populations.
