# Supplementary material
Source: PubMed Central journal article supplement (PMC7266679)
Supplement: NIHMS1584831-supplement-S10.pdf [file NIHMS1584831-supplement-S10.pdf]

Fig. S10

A.

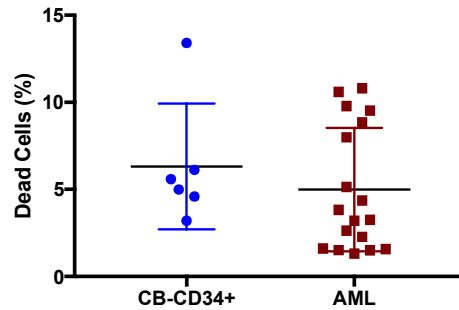

B.

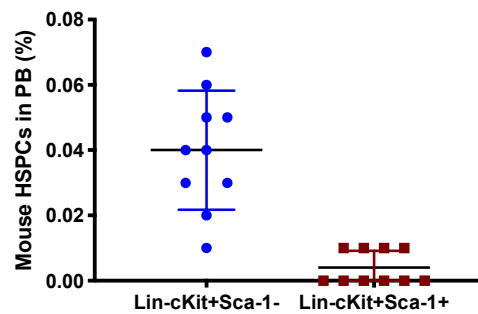

**Mouse HSPCs in NSG<sup>spln-</sup>-PDX mice do not exhibit increased apoptosis/cell death or displacement into PB.** (A). The annexin V<sup>+</sup>/PI<sup>+</sup> fractions of HSPCs from mononuclear cell fractions of each mouse in Figure 3B-F were used to determine the degree of apoptosis/cell death. (B). The frequency of mouse HSPCs in the PB of NSG<sup>spln-</sup>-PDX mice was determined at 12 weeks following engraftment.
