# Supplementary material
Source: PubMed Central journal article supplement (PMC7266679)
Supplement: NIHMS1584831-supplement-S11.pdf [file NIHMS1584831-supplement-S11.pdf]

Fig. S11

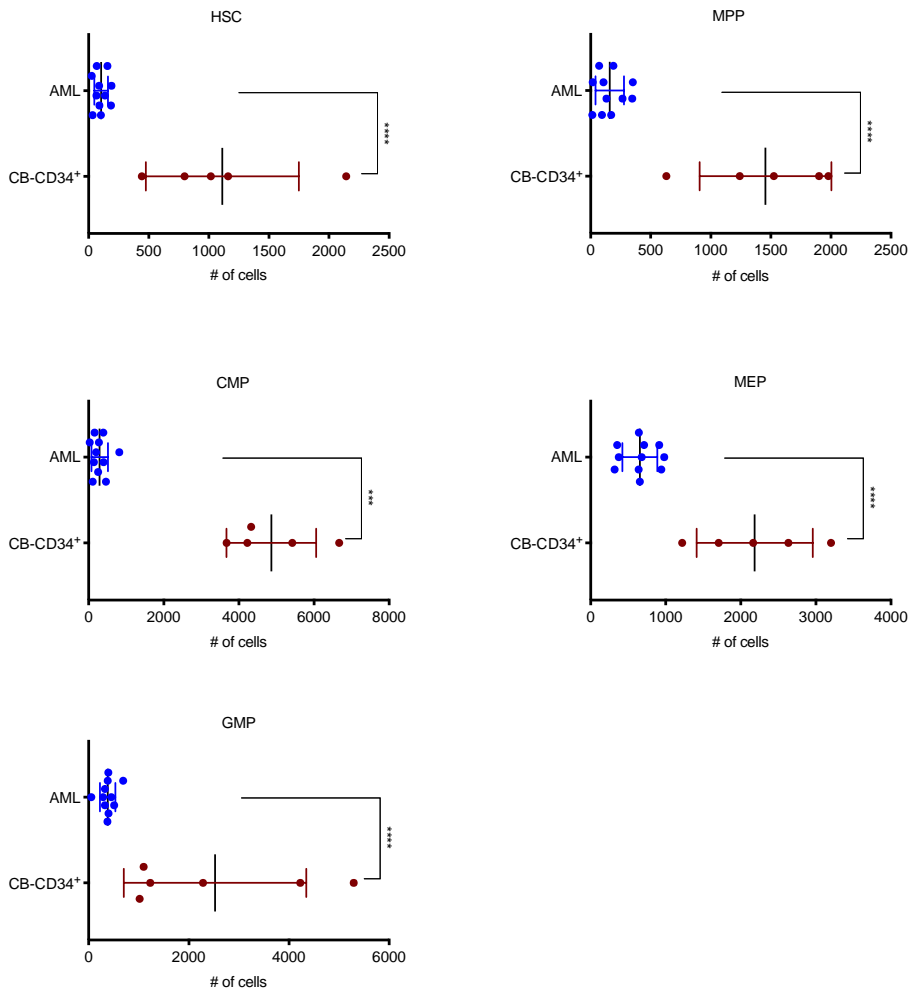

**Mouse hematopoietic stem and progenitor cells are similarly depleted in NSG<sup>sham</sup>-PDX mice.** Absolute numbers of HSC (AML 103±25.6 vs CB 1112±185; p<0.0001), MPP (AML 160±37 vs CB 1456±167; p<0.001), CMP (AML 293±35.8 vs CB 4864±358; p<0.0001), MEP (AML 657±35.6 vs CB 2186±247; p<0.0001), and GMP (AML 381±47 vs CB 2525±538; p<0.0012) in NSG<sup>sham</sup>-PDX (n=5) or NSG<sup>sham</sup>-CB-CD34<sup>+</sup> (n=5) mice 8 weeks after transplantation.
