# Supplementary material
Source: PubMed Central journal article supplement (PMC7266679)
Supplement: NIHMS1584831-supplement-S12.pdf [file NIHMS1584831-supplement-S12.pdf]

Fig. S12

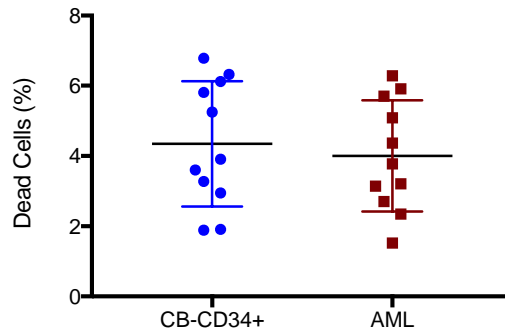

**Mouse proerythroblasts in NSG<sup>spln-</sup>-PDX mice exhibit similar levels of apoptosis/cell death.**

(A). The percentages of annexin V<sup>+</sup>/PI<sup>+</sup> proerythroblasts from each mononuclear cell fractions of each mouse in Figure 3M-P were used to determine the degree of apoptosis/cell death.
