# Supplementary material
Source: PubMed Central journal article supplement (PMC7266679)
Supplement: NIHMS1584831-supplement-S13.pdf [file NIHMS1584831-supplement-S13.pdf]

Fig. S13.

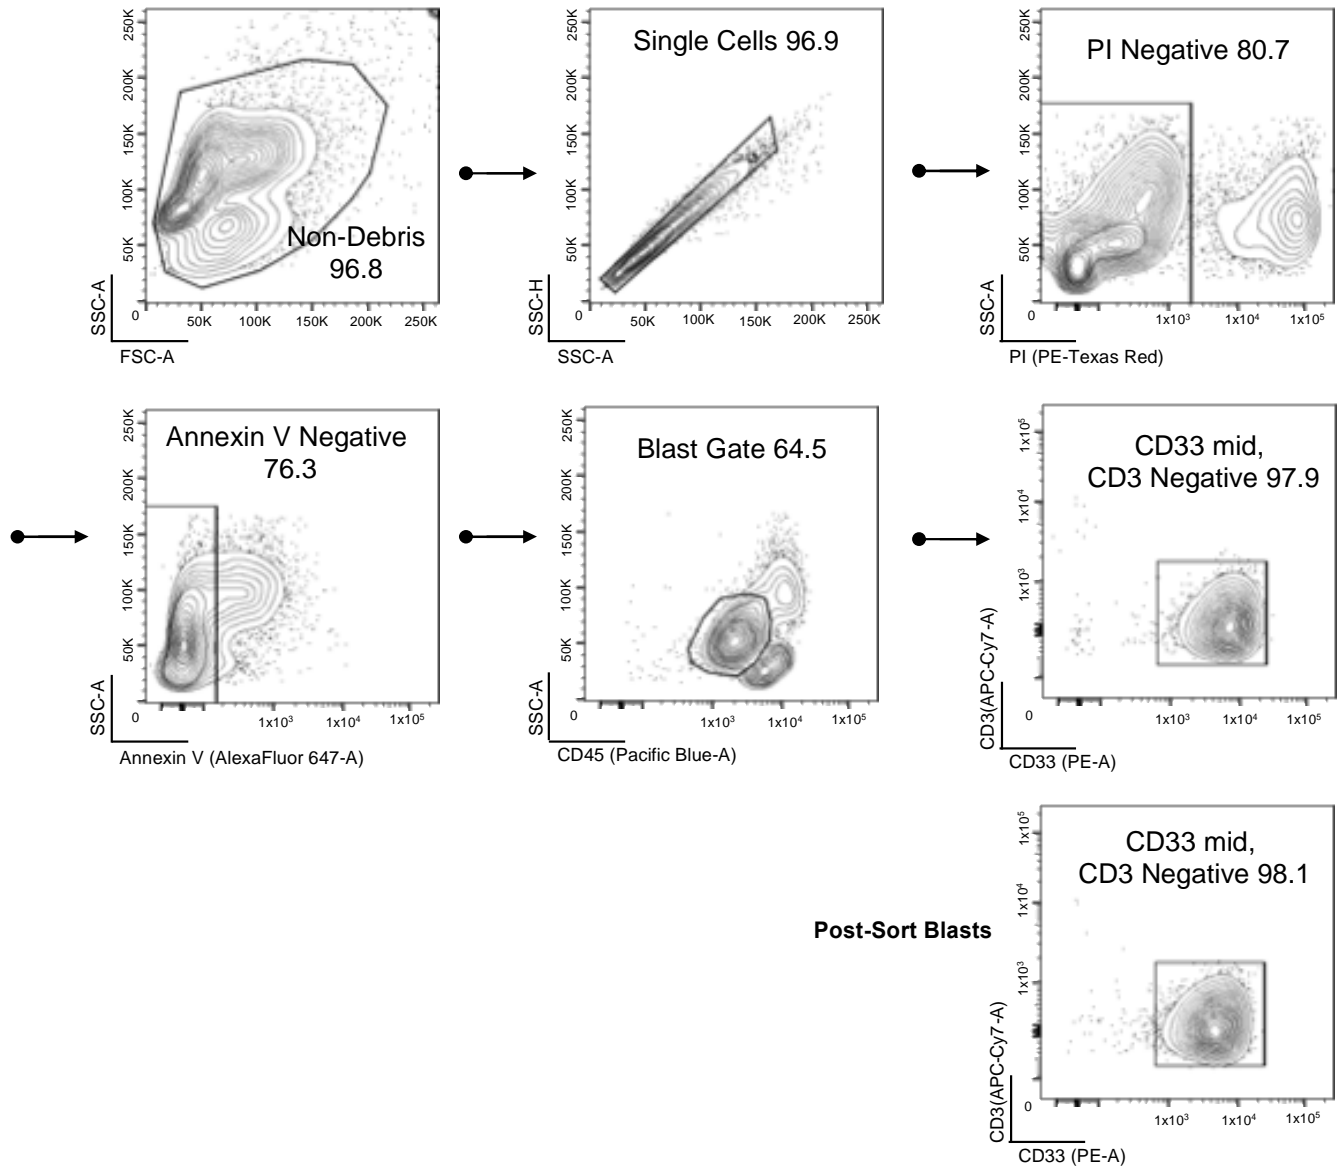

**Representative markers and gating strategy used to sort purified populations of human AML blasts.** Patient samples were stained to identify human AML blasts expressing  $CD45^{mid/low}CD33^{mid}CD3^{-}$ . Blast cells were sorted and post-sort analysis was conducted to assess purity.
