# Supplementary material
Source: PubMed Central journal article supplement (PMC7266679)
Supplement: NIHMS1584831-supplement-S14.pdf [file NIHMS1584831-supplement-S14.pdf]

Fig. S14.

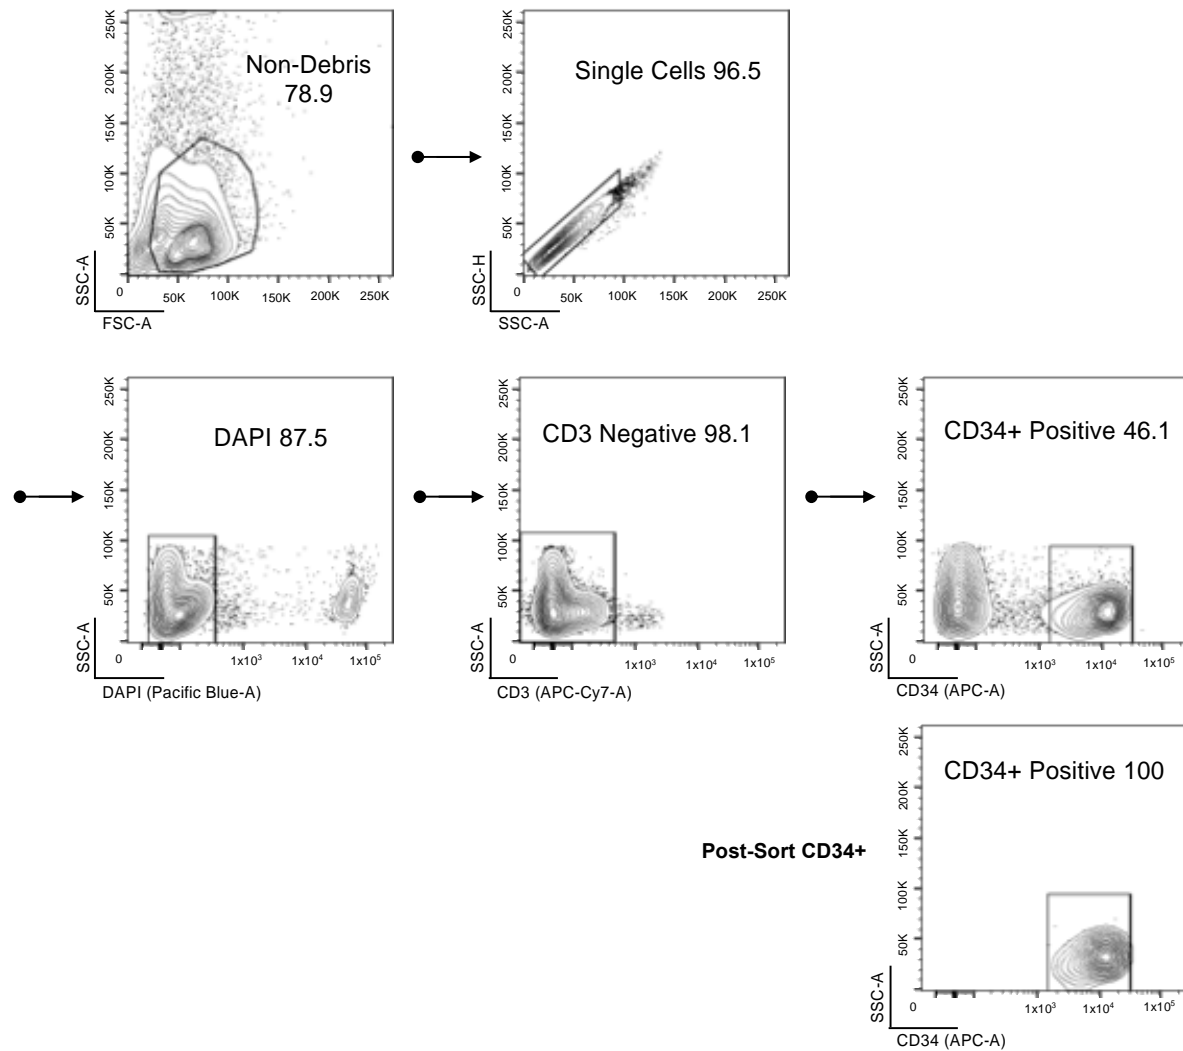

**Representative markers and gating strategy used to sort purified populations of human CB-CD34<sup>+</sup> cells.** Cord blood was enriched for CD34<sup>+</sup> cells using positive magnetic selection, and cells were stained using antibodies specific for hCD3 and hCD34 to isolate purified populations of CB-CD34<sup>+</sup> progenitors by flow cytometry. A post-sort analysis was conducted to assess purity.
