# Supplementary material
Source: PubMed Central journal article supplement (PMC7266679)
Supplement: NIHMS1584831-supplement-S15.pdf [file NIHMS1584831-supplement-S15.pdf]

Fig. S15. Viability of primary AML cells.

A.

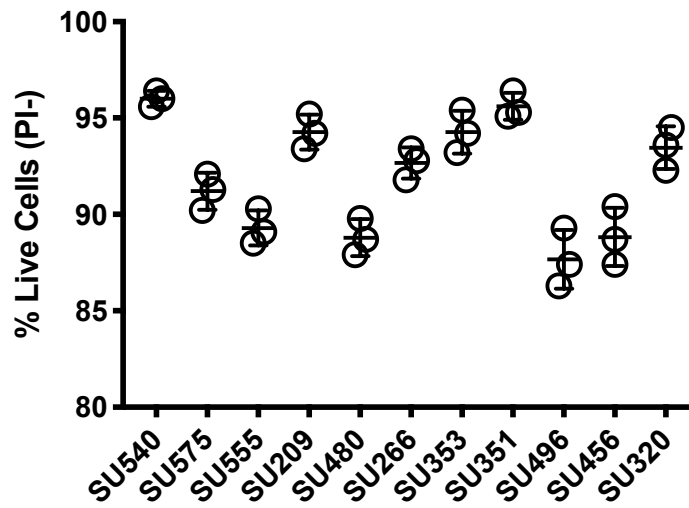

B.

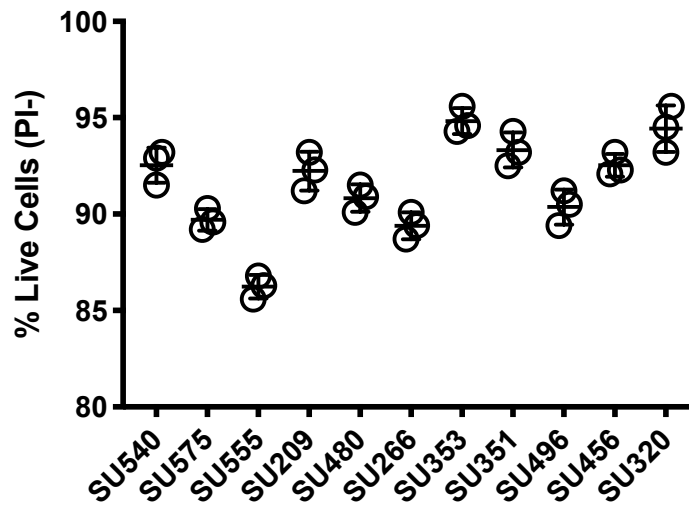

**Viability of human AML in culture.** (A) Percentages of live (PI<sup>-</sup>) human AML cells in culture (14-21 days). (B) Percentages of live (PI<sup>-</sup>) human AML blasts flow purified as described at the end of 72 h culture in SFEM supplemented with TPO, SCF, and FLT3L for generation of conditioned medium.
