# Supplementary material
Source: PubMed Central journal article supplement (PMC7266679)
Supplement: NIHMS1584831-supplement-S16_b_.pdf [file NIHMS1584831-supplement-S16_b_.pdf]

C.

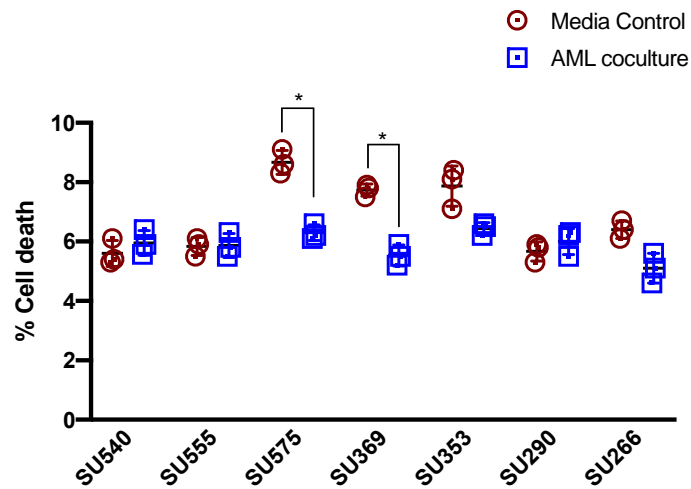

**Human AML blasts do not block erythroid differentiation by inhibition of cell cycle entry or induction of cell death.** (A) Absolute number of CD71<sup>+</sup>/GPA<sup>+</sup> normoblasts in culture on day 6 of the transwell assay in the absence or presence of purified AML blasts. \*p<0.01 by unpaired t-test. (B) Percentage of EDU<sup>+</sup> or (C) PI<sup>+</sup> CB-CD34<sup>+</sup> cells in the transwell assay in the absence or presence of purified AML blasts. \*p<0.05 by unpaired t-test.
