# Supplementary material
Source: PubMed Central journal article supplement (PMC7266679)
Supplement: NIHMS1584831-supplement-S17.pdf [file NIHMS1584831-supplement-S17.pdf]

Fig. S17.

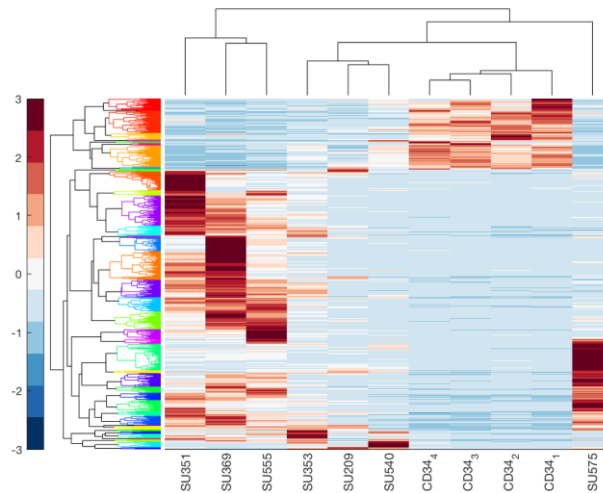

B.

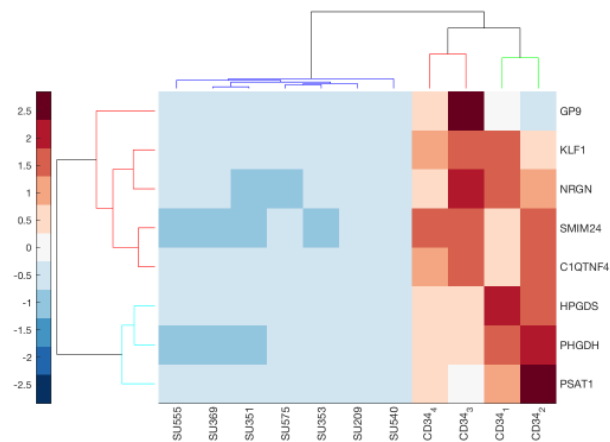

**RNA-Seq of purified populations of human AML blasts and CB-CD34<sup>+</sup> cells shows an inflammatory transcriptome signature in AML.** (A) Heatmap representation of unsupervised hierarchical clustering of the differentially expressed transcripts between purified populations of primary human AML blasts (n=7) and normal CB-CD34<sup>+</sup> cells (n=4). (B) Heatmap of the transcripts whose expression was down regulated at least 8 fold ( $p < 0.00005$ ) in AML blasts compared to normal CB-CD34<sup>+</sup> cells.
