# Supplementary material
Source: PubMed Central journal article supplement (PMC7266679)
Supplement: NIHMS1584831-supplement-S18.pdf [file NIHMS1584831-supplement-S18.pdf]

Fig. S18.

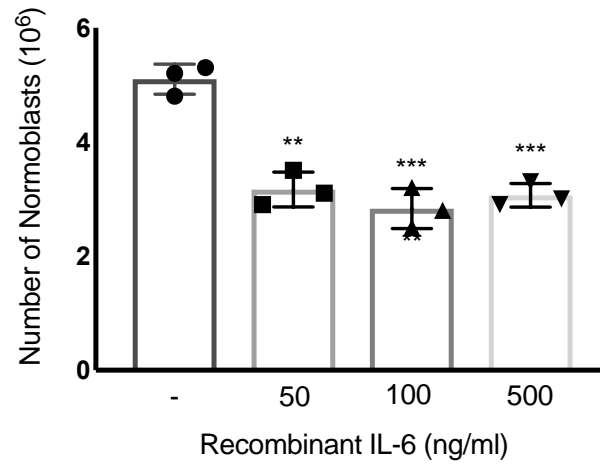

**Effects of the addition of recombinant human IL-6 on normal CB-CD34<sup>+</sup> progenitors undergoing erythroid differentiation.** Recombinant human IL-6 (0-500 ng/ml) was added to triplicate liquid cultures containing normal human CD34<sup>+</sup> progenitors (n=3 CB-CD34<sup>+</sup> cells from independent donors) in EPO, IL-3, and SCF. The number of CD71<sup>+</sup>GPA<sup>+</sup> cells was determined by flow cytometry on day 6 of culture.
