# Supplementary material
Source: PubMed Central journal article supplement (PMC7266679)
Supplement: NIHMS1584831-supplement-S19.pdf [file NIHMS1584831-supplement-S19.pdf]

Figure S19

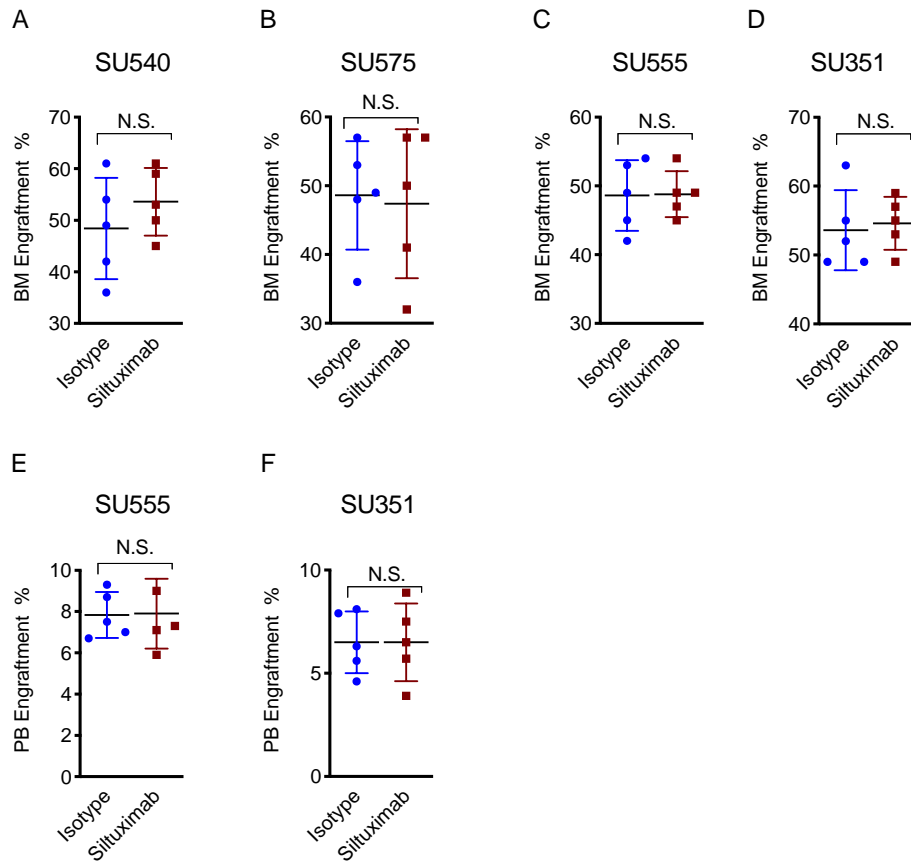

**Siltuximab treatment does not decrease leukemic burden in NSG<sup>spln</sup>- mice engrafted with human AML.** NSG<sup>spln</sup>- mice were engrafted with indicated human AML samples. Control antibody and siltuximab treatment began on day 3 after engraftment and continued every 72 hours until the end of the experiment. Human AML disease burden was examined at week 6-8 in the BM of NSG<sup>spln</sup>- mice engrafted with (A) SU540, (B) SU575, (C) SU555, (D) SU351. AML burden was assessed in the PB of NSG<sup>spln</sup>- mice engrafted with (E) SU555 and (F) SU351. N.S. = not significant. N = 5 for all experiments above.
