# Supplementary material
Source: PubMed Central journal article supplement (PMC7266679)
Supplement: NIHMS1584831-supplement-S20.pdf [file NIHMS1584831-supplement-S20.pdf]

Figure S20

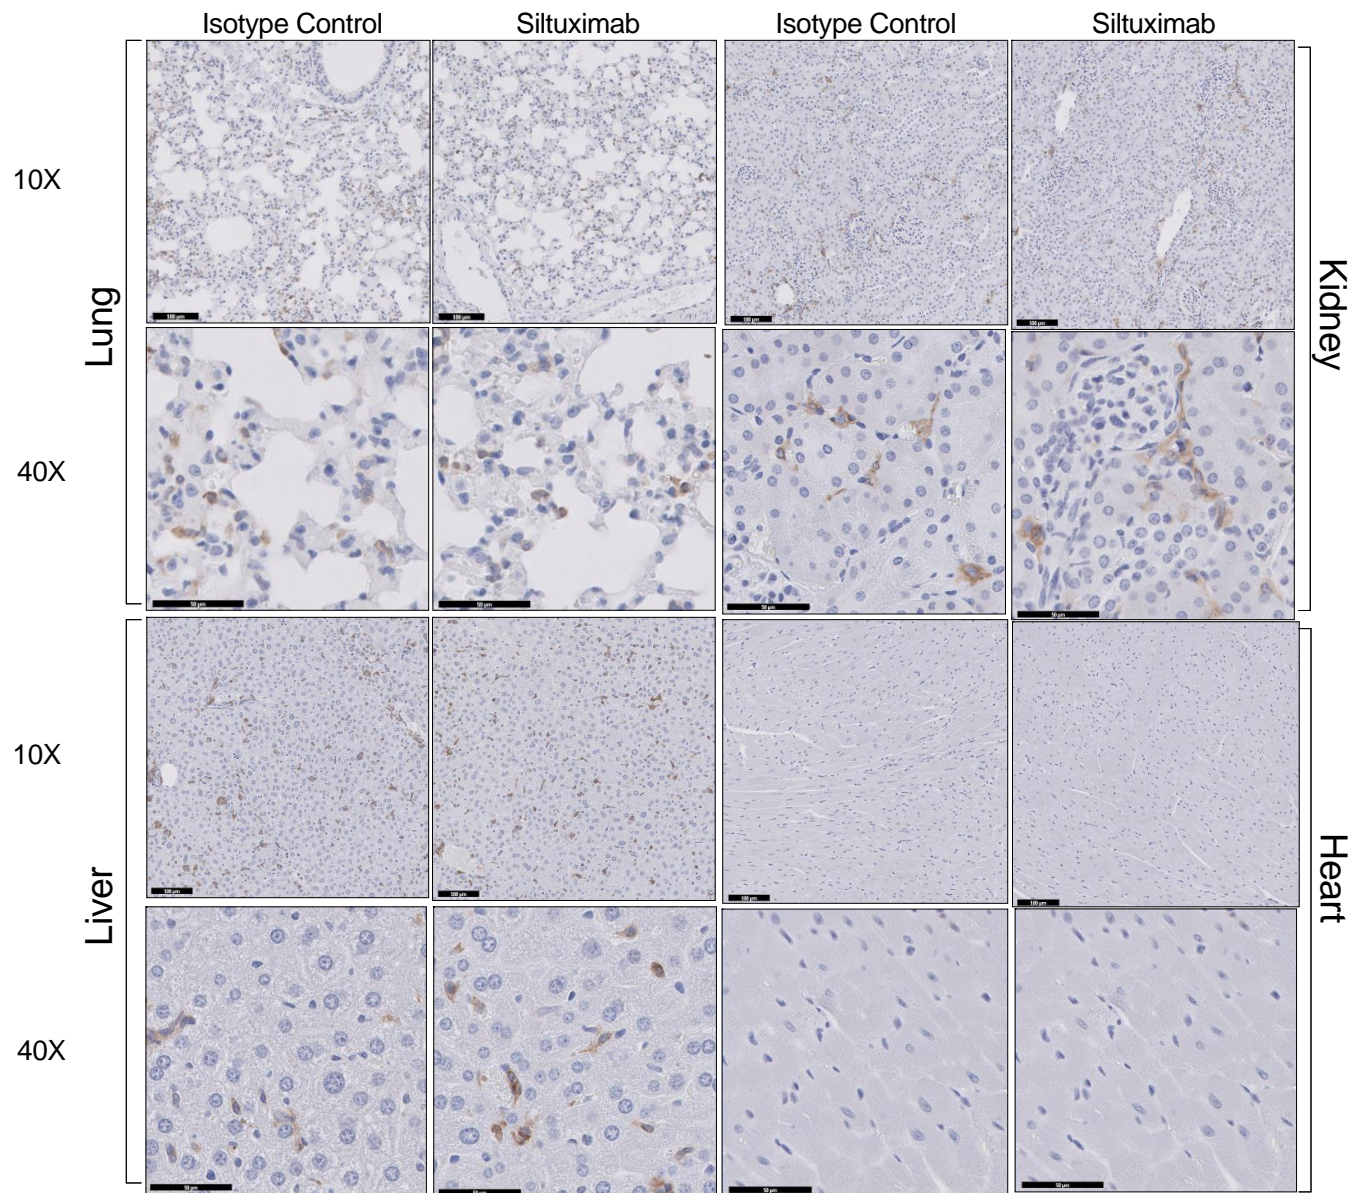

**Siltuximab treatment does not decrease leukemic burden in various organs of NSG<sup>spln</sup>- mice engrafted with human AML.** Representative IHC stain of human CD45 (brown) in the lung, kidney, liver, and heart to evaluate organ infiltration by human AML in NSG<sup>spln</sup>-PDX (SU540) mice treated with isotype control (n=5) or siltuximab (n=5) as described. Scale bars represent 100µm (10x top panel) and 50 µm (40x bottom panel).
