# Supplementary material
Source: PubMed Central journal article supplement (PMC7266679)
Supplement: NIHMS1584831-supplement-S22.pdf [file NIHMS1584831-supplement-S22.pdf]

Fig. S22

A.

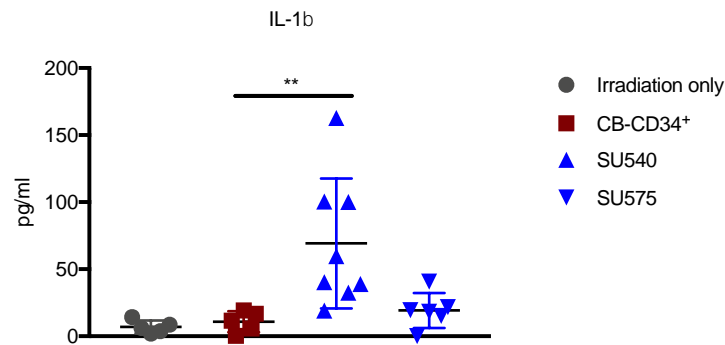

B.

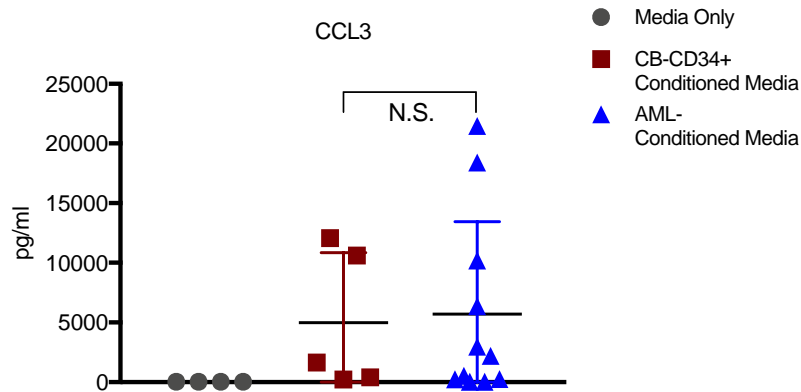

### IL-1 $\beta$ and CCL3 production in NSG<sup>spln</sup>-PDX mice and AML conditioned medium

(A) IL-1 $\beta$  concentrations in the BM plasma of splenectomized NSG mice engrafted with SU540 and SU575 determined by multiplex protein array (n = 15) compared to similar mice engrafted with CB-CD34<sup>+</sup> cells (n=5) or irradiated only control mice (n=4). \*\*p<0.01 unpaired t-test. (B) CCL3 production by purified primary AML blasts (n = 10) in culture determined by multiplex protein array compared to CB-CD34<sup>+</sup> cells (n=5) and medium only control (n=4) N.S.=not significant.
