# Supplementary material
Source: PubMed Central journal article supplement (PMC7266679)
Supplement: NIHMS1584831-supplement-Table_S1.pdf [file NIHMS1584831-supplement-Table_S1.pdf]

Table S1.

| <b>Stanford Cancer Center</b>                                           |                       |
|-------------------------------------------------------------------------|-----------------------|
| <b>Number of Patients</b>                                               | 293                   |
| <b>Time of Diagnosis</b>                                                | 2011-2014             |
| <b>Age (yrs)</b><br>Mean (SD)<br>Median                                 | 63 (16)<br>67 (21-89) |
| <b>Sex</b><br>Male<br>Female                                            | 169<br>124            |
| <b>Risk Category (2017 ELN)</b><br>Favorable<br>Intermediate<br>Adverse | 14<br>153<br>126      |

**Summary of patient characteristics whose clinical data were included for analysis in Figure**

**1A-D** ELN: European Leukemia Net risk category
