# Supplementary material
Source: PubMed Central journal article supplement (PMC7266679)
Supplement: NIHMS1584831-supplement-Table_S2.pdf [file NIHMS1584831-supplement-Table_S2.pdf]

Table S2.

| <b>Campbell et al</b>           |             |
|---------------------------------|-------------|
| <b>Number of Patients</b>       | 1,376       |
| <b>Time of Diagnosis</b>        | 2005-2015   |
| <b>Age (yrs)</b>                |             |
| Mean (SD)                       | 47.8 (12.3) |
| Median                          | 49 (18-84)  |
| <b>Sex</b>                      |             |
| Male                            | 740         |
| Female                          | 636         |
| <b>Risk Category (2017 ELN)</b> |             |
| Favorable                       | 195         |
| Intermediate                    | 867         |
| Adverse                         | 204         |

**Summary of patient characteristics whose clinical data were included for analysis in figures**

**S1 and S2.** ELN: European Leukemia Net risk category
