# Supplementary material
Source: PubMed Central journal article supplement (PMC7266679)
Supplement: NIHMS1584831-supplement-Table_S3.pdf [file NIHMS1584831-supplement-Table_S3.pdf]

Figure S3

| Sample | Sex | Age | Type              | ELN     | FAB | CG               | Somatic Mutation                                 | WBC   | HGB  | PLT |
|--------|-----|-----|-------------------|---------|-----|------------------|--------------------------------------------------|-------|------|-----|
| SU209  | F   | 66  | de novo           | INT     | M2  | 46XY             | NPM1, FLT3, NOTCH2                               | 166   | 8.8  | 133 |
| SU266  | M   | 65  | de novo           | Adverse | -   | Inv(3)           | SETD2, TET2, AK2, ASXL1, FLT3-ITD                | 374   | 9.9  | 36  |
| SU351  | M   | 75  | secondary MDS-AML | Adverse | M5  | Complex          | IDH2, NRAS, BCORL1, SETD                         | 3.2   | 9.7  | 26  |
| SU353  | M   | 66  | de novo           | INT     | M4  | 46XY             | NPM1, FLT3-ITD, DNMT3A,                          | 111   | 9.6  | 73  |
| SU456  | M   | 55  | secondary MDS-AML | Adverse | -   | Complex          | NRAS, TP53                                       | 1.8   | 7.6  | 146 |
| SU480  | F   | 64  | de novo           | INT     | M1  | 46XX             | CEPBA, FLT3-ITD, DNMT3A, TET2, BCOR, ZRSR2, TET2 | 16.9  | 7.4  | 112 |
| SU496  | M   | 24  | de novo           | INT     | -   | (+) <sup>8</sup> | TP53, IDH2, DNMT3A, STAG2, BCOR, ZRSR2, TET2     | 35.4  | 10.3 | 44  |
| SU540  | F   | 68  | de novo           | INT     | -   | 46XX             | DNMT3A, MYC, CEPBA, NPM1, FLT3-ITD, TET2         | 94.4  | 5.6  | 189 |
| SU555  | F   | 27  | de novo           | INT     | -   | -                | PTPN11, SETD2, MTND5                             | 103.2 | 7.5  | 28  |
| SU575  | M   | 72  | secondary MDS-AML | INT     | -   | 46XY             | NPM1, FLT3-ITD, DNMT2, ZRSR2, JAK3               | 28.4  | 8.3  | 23  |

**Patient and disease-specific characteristics of human AML samples investigated here.**

ELN: European Leukemia Net risk category; FAB: French-American-British AML classification; CG: cytogenetics; WBC: white blood cell ( $10^3/\mu\text{l}$ ); HGB: hemoglobin (g/dL); PLT: platelet ( $10^3/\mu\text{L}$ ).
