# Supplementary material
Source: PubMed Central journal article supplement (PMC7266679)
Supplement: NIHMS1584831-supplement-Table_S5.pdf [file NIHMS1584831-supplement-Table_S5.pdf]

Table S5.

|                 | <b>GM</b> | <b>M</b> | <b>G</b> | <b>GEMM</b> | <b>BFU</b> |
|-----------------|-----------|----------|----------|-------------|------------|
| <b>Media</b>    | 14        | 15       | 21       | 23          | 69         |
| <b>CB-CD34+</b> | 21        | 8        | 44       | 22          | 83         |
| <b>CB-CD34+</b> | 20        | 5        | 39       | 21          | 55         |
| <b>CB-CD34+</b> | 10        | 5        | 29       | 14          | 65         |
| <b>SU540</b>    | 6         | 5        | 36       | 16          | 37         |
| <b>SU575</b>    | 9         | 12       | 38       | 16          | 37         |
| <b>SU555</b>    | 10        | 6        | 35       | 17          | 19         |
| <b>SU209</b>    | 8         | 16       | 33       | 16          | 35         |
| <b>SU480</b>    | 11        | 14       | 28       | 15          | 38         |
| <b>SU369</b>    | 11        | 11       | 32       | 15          | 38         |
| <b>SU456</b>    | 9         | 8        | 27       | 15          | 43         |
| <b>SU351</b>    | 8         | 11       | 64       | 18          | 37         |

**Human AML-CM suppresses human progenitor colony formation.** Number of human erythroid and myeloid colonies formed in the presence of control or AML-CM as presented in Figure 4D. All numbers are average values of technical triplicates.
