# Supplementary material
Source: PubMed Central journal article supplement (PMC7266679)

Fig. S16.

A.

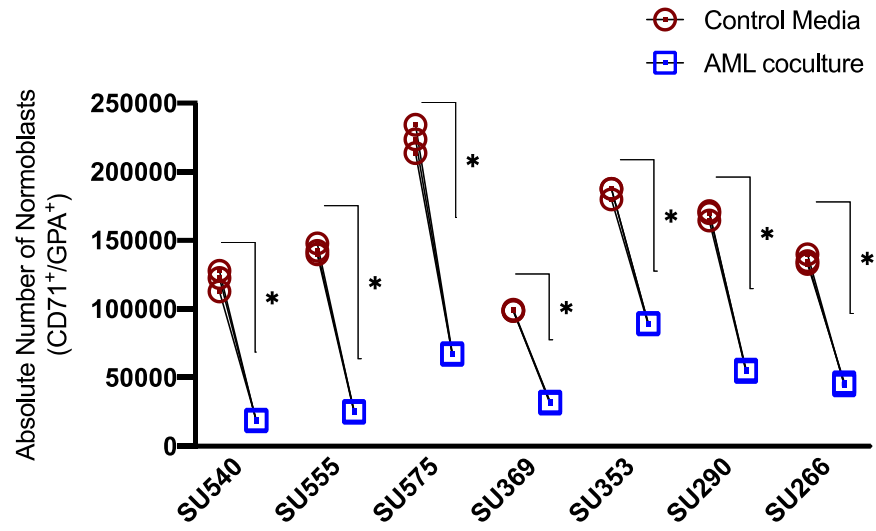

B.

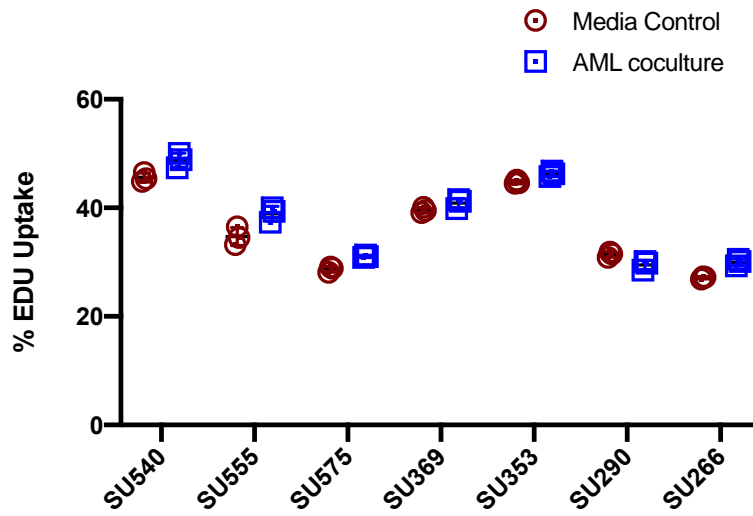

Supplement: NIHMS1584831-supplement-S16_a_.pdf [file NIHMS1584831-supplement-S16_a_.pdf]

Fig. S1

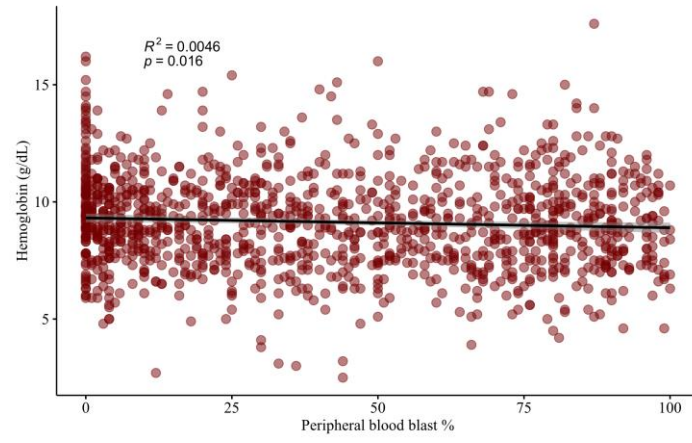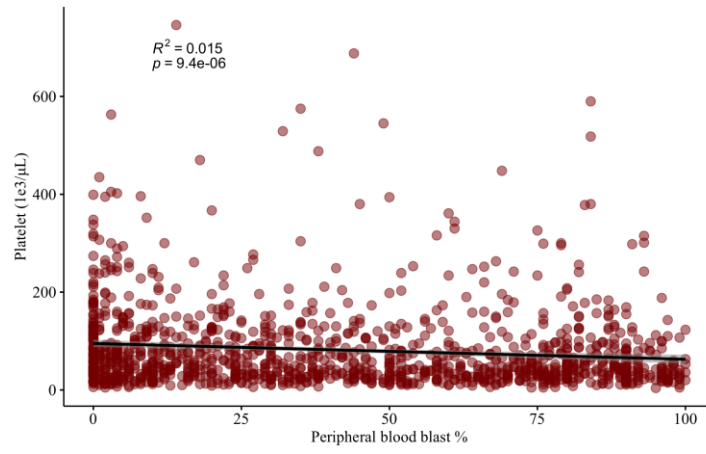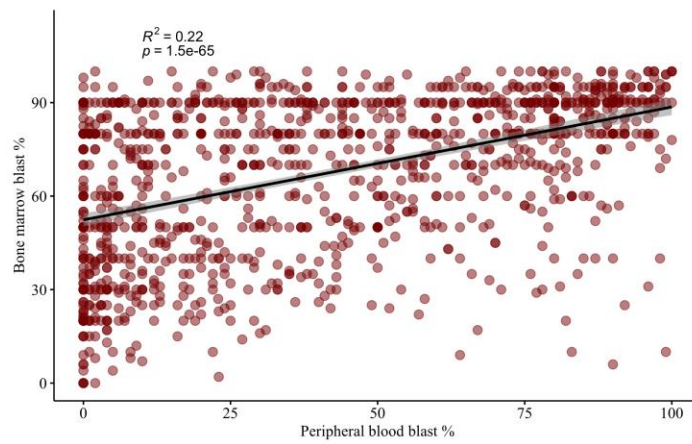

Supplement: NIHMS1584831-supplement-S1_a_.pdf [file NIHMS1584831-supplement-S1_a_.pdf]

Fig. S2

A.

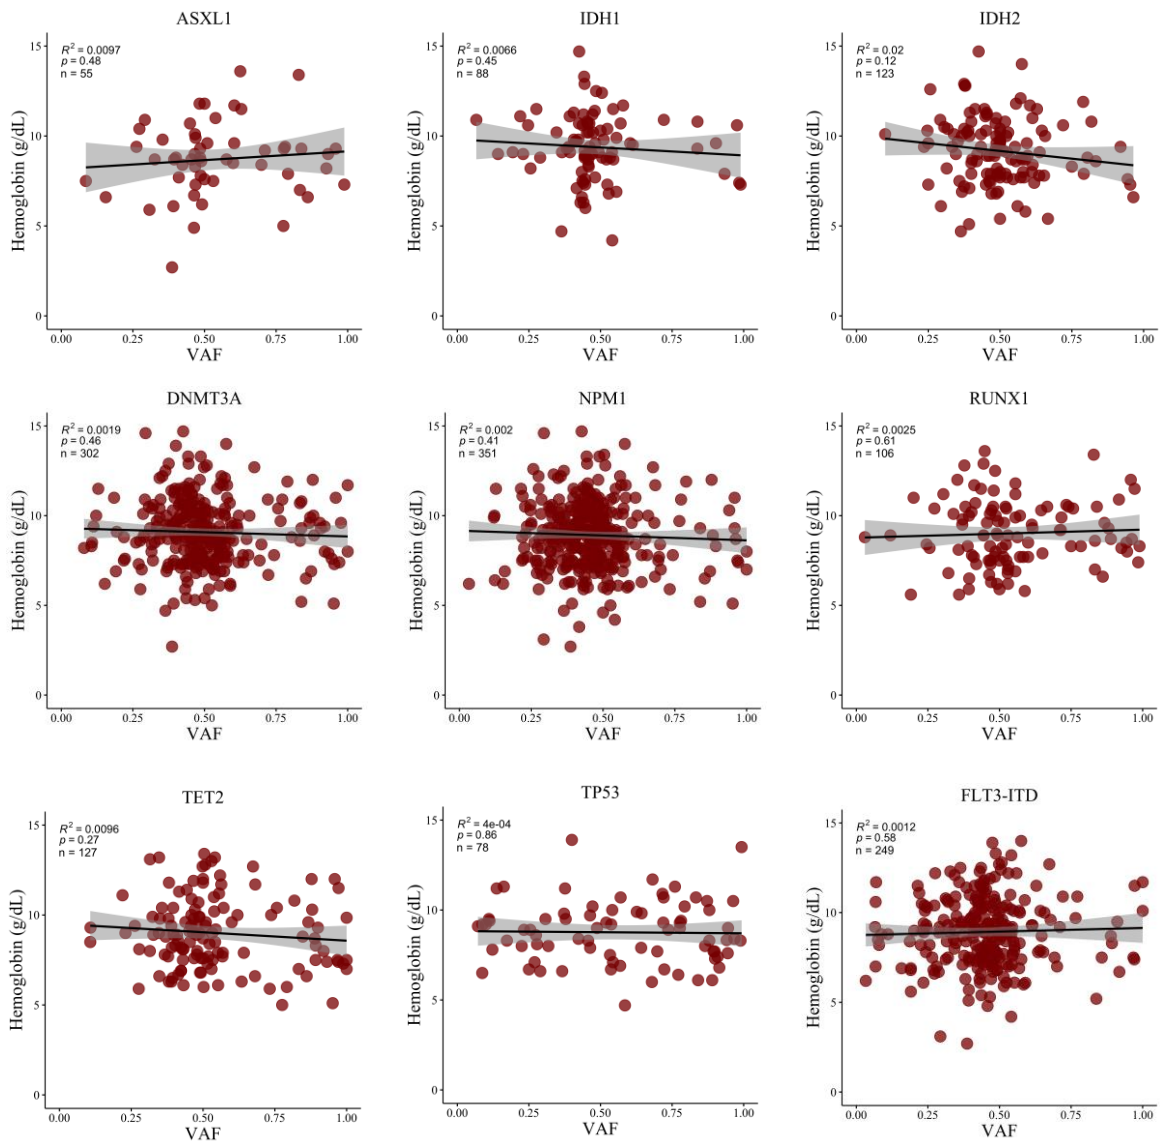

Supplement: NIHMS1584831-supplement-S2_a_.pdf [file NIHMS1584831-supplement-S2_a_.pdf]

Fig. S8

A.

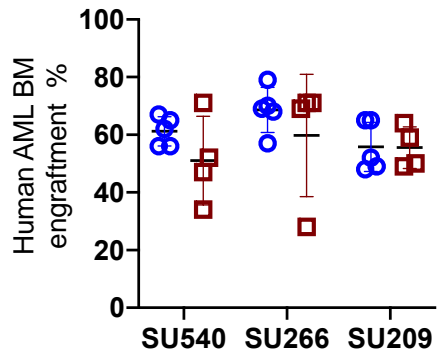

B.

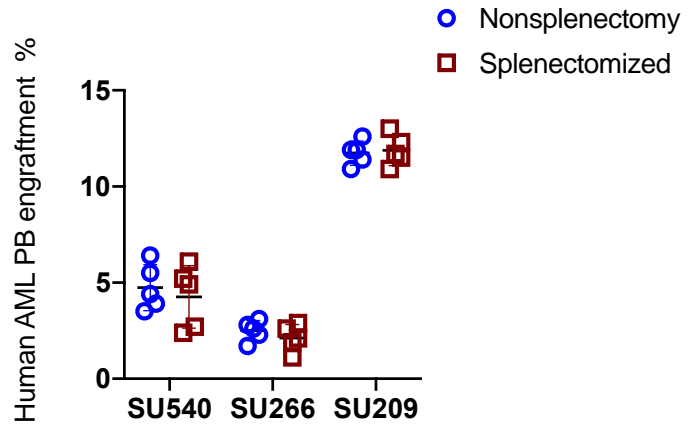

C.

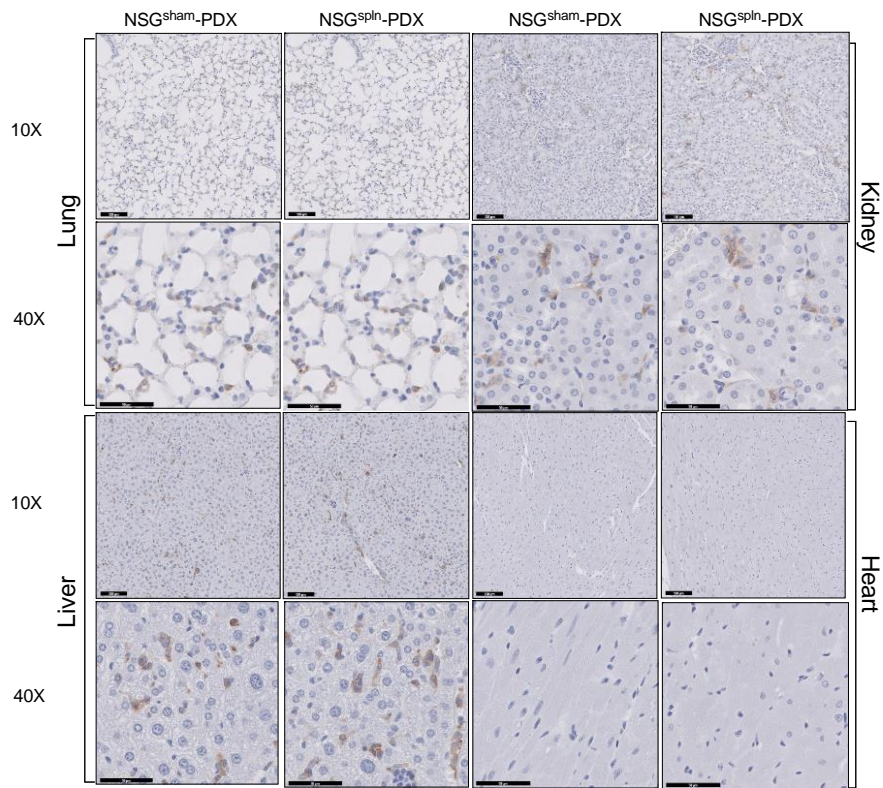

Supplement: NIHMS1584831-supplement-S8_a_.pdf [file NIHMS1584831-supplement-S8_a_.pdf]

Fig. S9

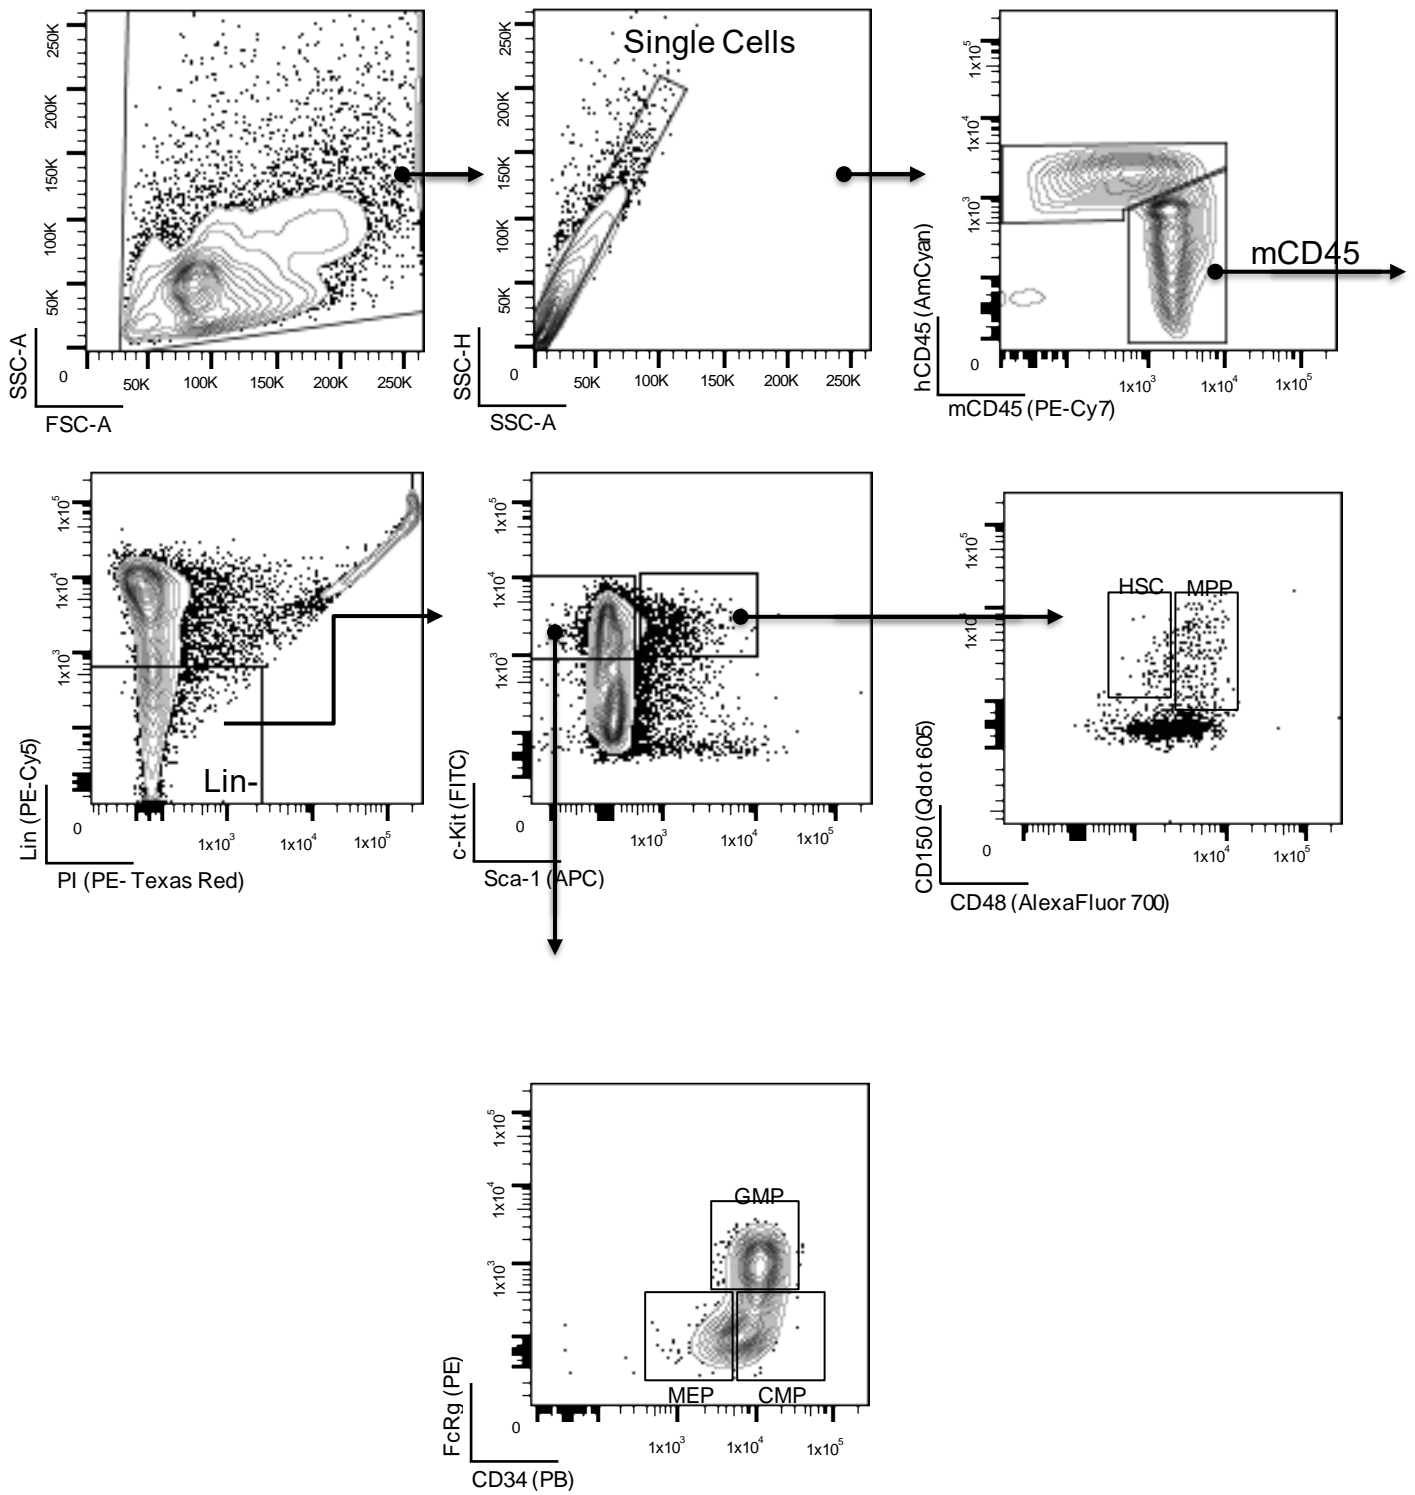

Supplement: NIHMS1584831-supplement-S9_a_.pdf [file NIHMS1584831-supplement-S9_a_.pdf]
